# Supplementary material for: Conditional T and NK cell antagonism by a giant and highly conserved orthopoxvirus virulence factor
Source: Research Square preprint supplement (doi:10.21203/rs.3.rs-8672980/v1), 2026-02-04
Supplement: Supplementary file 1 [file 2401acc062ee51305d3e99e8.xlsx]

## Sheet: D7 WT UP
Geneid	baseMean	log2FoldChange	padj	gene_name
ENSMUSG00000031762	457.185	-4.34377	1.34e-06	Mt2
ENSMUSG00000031765	562.129	-3.67349	3.64e-11	Mt1
ENSMUSG00000029581	26.1979	-2.74744	0.000151727	Fscn1
ENSMUSG00000053469	69.6767	-2.29313	2.04e-05	Tg
ENSMUSG00000062380	38.871	-2.28494	2.1e-05	Tubb3
ENSMUSG00000029752	76.4033	-2.26937	2.81e-06	Asns
ENSMUSG00000027797	133.698	-2.22838	1.34e-06	Dclk1
ENSMUSG00000121035	197.059	-2.2125	9.57e-06	NA
ENSMUSG00000085241	440.192	-2.1571	1.28e-06	Snhg3
ENSMUSG00000018417	20.64	-2.13734	0.00131905	Myo1b
ENSMUSG00000026830	25.8945	-2.12562	0.000773372	Ermn
ENSMUSG00000115869	34.8819	-1.93409	0.00150609	NA
ENSMUSG00000026784	66.4118	-1.93315	3.16e-06	Pdss1
ENSMUSG00000036106	68.9068	-1.91434	0.00390052	Prr5
ENSMUSG00000031760	199.695	-1.90442	0.00230754	Mt3
ENSMUSG00000026749	34.0131	-1.86433	0.00107233	Nek6
ENSMUSG00000049235	40.0335	-1.81737	0.000194829	Gm7324
ENSMUSG00000051341	231.945	-1.72088	0.00376816	Zfp52
ENSMUSG00000039787	28.1517	-1.70305	0.0017322	Cercam
ENSMUSG00000026018	25.2684	-1.65228	0.0142612	Ica1l
ENSMUSG00000071547	28.0322	-1.60837	0.0150916	Nt5dc2
ENSMUSG00000030268	54.1114	-1.5535	0.000167782	Bcat1
ENSMUSG00000027858	46.6661	-1.51831	0.000608028	Tspan2
ENSMUSG00000091625	106.736	-1.51559	0.00051603	Lsm5
ENSMUSG00000021569	138.184	-1.49754	0.000167782	Trip13
ENSMUSG00000022621	20.7022	-1.44446	0.00294407	Rabl2
ENSMUSG00000074274	60.3894	-1.43212	0.0116652	D930028M14Rik
ENSMUSG00000026073	57.186	-1.41353	0.00246598	Il1r2
ENSMUSG00000017861	113.884	-1.4047	0.010598	Mybl2
ENSMUSG00000020534	161.984	-1.40437	4.72e-05	Shmt1
ENSMUSG00000027533	79.595	-1.39063	0.0167494	Fabp5
ENSMUSG00000063018	21.3799	-1.38579	0.00746407	2010204K13Rik
ENSMUSG00000040010	283.829	-1.37213	0.00168953	Slc7a5
ENSMUSG00000022797	141.804	-1.36894	3.06e-05	Tfrc
ENSMUSG00000023456	1353.99	-1.36626	0.000623626	Tpi1
ENSMUSG00000030652	67.1297	-1.35325	0.0153256	Coq7
ENSMUSG00000041377	21.5106	-1.33603	0.00352391	Ninj2
ENSMUSG00000021965	87.4387	-1.32353	0.00340415	Ska3
ENSMUSG00000080727	66.3903	-1.32187	0.00206538	C920021L13Rik
ENSMUSG00000001665	55.84	-1.31934	0.00247521	Gstt3
ENSMUSG00000049985	20.4601	-1.31311	0.0286055	Ankrd55
ENSMUSG00000026826	25.2853	-1.30917	0.0178329	Nr4a2
ENSMUSG00000021792	112.755	-1.30911	8.47e-05	Fam213a
ENSMUSG00000027999	185.637	-1.30727	0.00257151	Pla2g12a
ENSMUSG00000026039	48.9469	-1.29492	0.000455061	Sgol2
ENSMUSG00000045031	23.8702	-1.27595	0.00232953	Cetn4
ENSMUSG00000028199	33.6206	-1.26149	0.00127444	Cryz
ENSMUSG00000031562	58.7319	-1.24414	0.000206378	Dctd
ENSMUSG00000061615	149.857	-1.24355	0.0358551	Hist1h2ab
ENSMUSG00000020899	94.8198	-1.2373	0.00265448	Pfas
ENSMUSG00000026069	99.6361	-1.2296	0.00905932	Il1rl1
ENSMUSG00000020116	93.2144	-1.22398	0.000791558	Pno1
ENSMUSG00000011008	29.5689	-1.20707	0.0199865	Mcoln2
ENSMUSG00000036169	255.514	-1.20401	0.0129756	Sostdc1
ENSMUSG00000024900	284.014	-1.1941	0.00122995	Cpt1a
ENSMUSG00000117869	130.617	-1.18895	0.00051603	NA
ENSMUSG00000027203	2717.72	-1.18502	0.00326207	Dut
ENSMUSG00000040675	295.066	-1.18486	6.67e-06	Mthfd1l
ENSMUSG00000087651	341.735	-1.17573	0.00147576	1500009L16Rik
ENSMUSG00000067235	105.754	-1.16837	0.0191578	H2-Q10
ENSMUSG00000057113	3817.74	-1.1666	2.36e-10	Npm1
ENSMUSG00000031146	317.306	-1.16541	0.0236266	Plp2
ENSMUSG00000035142	33.8898	-1.16311	0.0195655	Nubpl
ENSMUSG00000030498	26.8318	-1.16006	0.0140224	Gas2
ENSMUSG00000069301	69.3789	-1.1576	0.0100189	Hist1h2ag
ENSMUSG00000040998	50.1326	-1.14974	0.0344834	Npnt
ENSMUSG00000069272	471.675	-1.14736	0.0298292	Hist1h2ae
ENSMUSG00000057359	678.631	-1.14287	0.0431516	Gm17494
ENSMUSG00000022422	50.7994	-1.13446	0.00249748	Dscc1
ENSMUSG00000025289	581.828	-1.12932	0.00144786	Prdx4
ENSMUSG00000022661	282.607	-1.12741	0.00557177	Cd200
ENSMUSG00000078154	21.5678	-1.12608	0.0490547	Gm12184
ENSMUSG00000025068	176.267	-1.1202	0.000309406	Gsto1
ENSMUSG00000033307	4869.84	-1.11175	0.0017322	Mif
ENSMUSG00000050914	30.6581	-1.10886	0.0351813	Ankrd37
ENSMUSG00000043153	37.2771	-1.10665	0.039599	Ispd
ENSMUSG00000030208	69.311	-1.1065	0.00245042	Emp1
ENSMUSG00000042029	133.671	-1.10502	0.00113624	Ncapg2
ENSMUSG00000027379	47.8411	-1.10305	0.00729813	Bub1
ENSMUSG00000041831	197.459	-1.10242	0.00672666	Sytl3
ENSMUSG00000019817	27.0178	-1.09913	0.00919691	Plagl1
ENSMUSG00000026536	59.9936	-1.09354	0.0170169	Mnda
ENSMUSG00000044201	207.826	-1.08966	0.0142612	Cdc25c
ENSMUSG00000027323	226.563	-1.08926	0.000344687	Rad51
ENSMUSG00000037278	107.649	-1.08798	0.0424591	Tmem97
ENSMUSG00000042379	35.9583	-1.08121	0.0196804	Esm1
ENSMUSG00000087213	25.5159	-1.08084	0.0234813	2810408I11Rik
ENSMUSG00000058290	315.182	-1.07941	0.00774981	Espl1
ENSMUSG00000041431	448.339	-1.07114	0.0116652	Ccnb1
ENSMUSG00000036777	23.5049	-1.06655	0.025429	Anln
ENSMUSG00000025732	66.6426	-1.05642	0.0184208	Fam195a
ENSMUSG00000058794	20.3398	-1.05466	0.0378126	Nfe2
ENSMUSG00000026134	228.742	-1.05206	0.00805057	Prim2
ENSMUSG00000030086	47.6956	-1.05047	0.0258788	Chchd6
ENSMUSG00000064371	46.1843	-1.04972	0.0128794	mt-Tt
ENSMUSG00000037601	3780.78	-1.04725	0.000176298	Nme1
ENSMUSG00000030254	86.6529	-1.0445	0.00232866	Rad18
ENSMUSG00000027099	99.9813	-1.04433	0.00405716	Mtx2
ENSMUSG00000023079	33.2623	-1.0367	0.0435192	Gtf2ird1
ENSMUSG00000032586	112.248	-1.03622	0.010335	Traip
ENSMUSG00000065353	84.3415	-1.03516	0.0153468	Snora73b
ENSMUSG00000062248	128.762	-1.03041	0.00365093	Cks2
ENSMUSG00000036781	2159.4	-1.02919	0.00841676	Rps27l
ENSMUSG00000006179	20.5626	-1.02878	0.0442244	Prss16
ENSMUSG00000026049	51.0347	-1.02497	0.0189813	Tex30
ENSMUSG00000044702	21.0644	-1.02389	0.0344834	Palb2
ENSMUSG00000047221	28.2446	-1.02356	0.0142612	Fam185a
ENSMUSG00000041840	74.2281	-1.02313	0.00619614	Haus1
ENSMUSG00000023505	849.731	-1.022	0.0104276	Cdca3
ENSMUSG00000050335	1194.49	-1.01765	0.0117208	Lgals3
ENSMUSG00000040658	67.9677	-1.01697	0.0334533	Dnph1
ENSMUSG00000020766	187.639	-1.01291	0.0201137	Galk1
ENSMUSG00000006398	504.836	-1.01082	0.0236266	Cdc20
ENSMUSG00000030346	177.258	-1.0085	0.0259076	Rad51ap1
ENSMUSG00000055760	27.11	-1.00798	0.0248063	Gemin6
ENSMUSG00000003824	141.799	-1.00343	0.000233023	Syce2
ENSMUSG00000045273	316.033	-0.995806	0.000157867	Cenph
ENSMUSG00000027367	513.219	-0.991005	0.000949876	Stard7
ENSMUSG00000060639	264.309	-0.988125	0.0145356	Hist1h4i
ENSMUSG00000026728	3009.37	-0.986849	0.00676891	Vim
ENSMUSG00000018821	35.4647	-0.985286	0.043278	Avpi1
ENSMUSG00000001039	25.3941	-0.982212	0.0302241	B9d1
ENSMUSG00000025161	116.774	-0.980923	0.0486782	Slc16a3
ENSMUSG00000052949	364.966	-0.975046	0.00841073	Rnf157
ENSMUSG00000047714	114.554	-0.970369	0.00535383	Ppp1r2
ENSMUSG00000069910	27.9495	-0.969174	0.0294258	Spdl1
ENSMUSG00000086629	23.0958	-0.969071	0.0298292	2810403D21Rik
ENSMUSG00000047534	145.751	-0.967149	0.0329447	Mis18bp1
ENSMUSG00000039396	68.3817	-0.966772	0.00791426	Neil3
ENSMUSG00000027342	662.082	-0.962208	0.019476	Pcna
ENSMUSG00000024521	74.2667	-0.959093	0.00496575	Pmaip1
ENSMUSG00000039748	69.8711	-0.958837	0.013316	Exo1
ENSMUSG00000048087	47.4174	-0.958434	0.0338364	Gm4737
ENSMUSG00000044573	85.5666	-0.956916	0.0164163	Acp1
ENSMUSG00000026281	478.324	-0.952405	0.0023164	Dtymk
ENSMUSG00000030792	129.536	-0.946316	0.0269798	Dkkl1
ENSMUSG00000058430	208.825	-0.943117	0.025429	Rpl27a-ps2
ENSMUSG00000053553	86.4805	-0.930942	0.0317256	3110082I17Rik
ENSMUSG00000035637	180.136	-0.929202	0.00623837	Grhpr
ENSMUSG00000018446	601.466	-0.925938	0.00168953	C1qbp
ENSMUSG00000064326	1199.69	-0.92565	0.0140224	Siva1
ENSMUSG00000081214	727.333	-0.924185	0.0351813	Rpl35a-ps2
ENSMUSG00000031629	56.7235	-0.923427	0.0367401	Cenpu
ENSMUSG00000022856	54.7446	-0.922527	0.00860814	Tmem41a
ENSMUSG00000032397	126.159	-0.922491	0.0241273	Tipin
ENSMUSG00000035863	42.5705	-0.921274	0.0259311	Palm
ENSMUSG00000108414	318.256	-0.915482	0.000284629	NA
ENSMUSG00000029247	885.204	-0.914979	0.0193624	Paics
ENSMUSG00000000982	90.6024	-0.914475	0.0483432	Ccl3
ENSMUSG00000021276	147.298	-0.912292	0.0234813	Cinp
ENSMUSG00000073987	86.5563	-0.910785	0.00841198	Ggh
ENSMUSG00000062190	41.6008	-0.910151	0.0316684	Lancl2
ENSMUSG00000028614	98.0729	-0.908651	0.010335	Ndc1
ENSMUSG00000018341	139.431	-0.905746	0.0378126	Il12rb2
ENSMUSG00000022671	84.1294	-0.90478	0.0224861	Mzt2
ENSMUSG00000026622	90.1954	-0.90439	0.0465342	Nek2
ENSMUSG00000054115	78.1605	-0.903365	0.0122136	Skp2
ENSMUSG00000070780	41.7412	-0.897673	0.0338364	Rbm47
ENSMUSG00000035683	78.5804	-0.896747	0.00458677	Melk
ENSMUSG00000022636	125.515	-0.896248	0.00499221	Alcam
ENSMUSG00000032113	46.132	-0.893882	0.00774375	Chek1
ENSMUSG00000051235	80.0127	-0.893784	0.0197574	Gen1
ENSMUSG00000029328	977.653	-0.892969	0.00441304	Hnrnpdl
ENSMUSG00000015880	291.081	-0.891407	0.00409093	Ncapg
ENSMUSG00000031197	213.464	-0.890305	0.00113528	Vbp1
ENSMUSG00000035455	83.0763	-0.89026	0.0400243	Fignl1
ENSMUSG00000034023	48.6055	-0.887781	0.0118728	Fancd2
ENSMUSG00000072694	488.078	-0.887291	0.00438794	1500011B03Rik
ENSMUSG00000025758	79.3058	-0.885402	0.00957993	Plk4
ENSMUSG00000040274	795.8	-0.884429	0.00441058	Cdk6
ENSMUSG00000024359	633.829	-0.882718	0.000497621	Hspa9
ENSMUSG00000043439	157.635	-0.881222	0.00433352	E130012A19Rik
ENSMUSG00000027667	56.1625	-0.878309	0.0304555	Zfp639
ENSMUSG00000030189	538.32	-0.877973	0.000842592	Ybx3
ENSMUSG00000037868	99.7688	-0.877435	0.00364813	Egr2
ENSMUSG00000016257	212.547	-0.875851	0.0320045	Slmo2
ENSMUSG00000026974	164.409	-0.872731	0.00350276	Zmynd19
ENSMUSG00000052997	496.139	-0.871339	0.0360303	Uba2
ENSMUSG00000022748	93.8996	-0.867089	0.0112306	Cmss1
ENSMUSG00000037851	200.536	-0.864693	0.0017322	Iars
ENSMUSG00000029814	247.204	-0.862819	0.0117337	Igf2bp3
ENSMUSG00000029730	1453.1	-0.862543	0.00905932	Mcm7
ENSMUSG00000075229	157.778	-0.861794	0.0028593	Ccdc58
ENSMUSG00000015112	142.779	-0.85732	0.0129175	Slc25a13
ENSMUSG00000021714	69.4935	-0.856034	0.00624256	Cenpk
ENSMUSG00000021193	110.593	-0.855734	0.0103494	Pitrm1
ENSMUSG00000100153	44.8279	-0.852441	0.0348934	Gm5601
ENSMUSG00000036875	108.805	-0.852239	0.011362	Dna2
ENSMUSG00000006715	406.017	-0.851516	0.0242424	Gmnn
ENSMUSG00000029782	133.754	-0.849357	0.0408749	Tmem209
ENSMUSG00000027597	148.927	-0.849191	0.0242424	Ahcy
ENSMUSG00000020328	145.237	-0.848109	0.0247587	Nudcd2
ENSMUSG00000080538	48.8856	-0.848087	0.010598	Gm25541
ENSMUSG00000031490	134.115	-0.84772	0.010932	Eif4ebp1
ENSMUSG00000062867	918.455	-0.844581	0.0432311	Impdh2
ENSMUSG00000071041	89.2779	-0.840109	0.0243507	Gm15210
ENSMUSG00000029920	178.408	-0.839141	0.0491917	Smarcad1
ENSMUSG00000022881	145.094	-0.838762	0.025429	Rfc4
ENSMUSG00000015217	209.862	-0.834634	0.0204757	Hmgb3
ENSMUSG00000021932	398.203	-0.832975	0.00759717	Rnaseh2b
ENSMUSG00000001056	1560.17	-0.832379	0.0028593	Nhp2
ENSMUSG00000059060	50.9187	-0.831128	0.024689	Rad51b
ENSMUSG00000034311	233.136	-0.829168	0.0382979	Kif4
ENSMUSG00000020973	61.2094	-0.829049	0.0393054	Dnaaf2
ENSMUSG00000118664	100.98	-0.828794	0.0219239	NA
ENSMUSG00000067365	240.21	-0.828586	0.0196937	Tmem128
ENSMUSG00000030224	486.108	-0.823924	0.000791558	Strap
ENSMUSG00000024177	59.1423	-0.820993	0.0330651	Nme4
ENSMUSG00000035268	31.1266	-0.816855	0.0491917	Pkig
ENSMUSG00000031904	106.186	-0.816219	0.01686	Slc7a6
ENSMUSG00000019961	1060.92	-0.816042	0.00905932	Tmpo
ENSMUSG00000087452	40.8816	-0.810241	0.0217375	Gm11998
ENSMUSG00000033904	53.842	-0.808488	0.037235	Ccp110
ENSMUSG00000037894	513.631	-0.806693	0.00542891	H2afz
ENSMUSG00000031756	107.423	-0.805096	0.0484435	Cenpn
ENSMUSG00000024145	78.142	-0.804255	0.0241273	Pigf
ENSMUSG00000026019	251.911	-0.800611	0.0122996	Wdr12
ENSMUSG00000023755	36.4538	-0.800597	0.0265083	Rhebl1
ENSMUSG00000029246	236.757	-0.796974	0.0105087	Ppat
ENSMUSG00000029036	221.074	-0.795572	0.0267834	Atad3a
ENSMUSG00000001305	101.901	-0.791163	0.0234813	Rrp15
ENSMUSG00000039682	140.844	-0.789139	0.0261679	Lap3
ENSMUSG00000028218	97.7475	-0.788909	0.010335	Fam92a
ENSMUSG00000026558	644.285	-0.786733	0.0252248	Uck2
ENSMUSG00000000295	299.523	-0.785006	0.0017322	Hddc2
ENSMUSG00000031167	83.8455	-0.784599	0.042973	Rbm3
ENSMUSG00000032547	67.0609	-0.784497	0.0241273	Ryk
ENSMUSG00000005899	165.659	-0.783843	0.03952	Smpd4
ENSMUSG00000002881	714.393	-0.777672	0.000791558	Nab1
ENSMUSG00000024640	773.784	-0.777569	0.0144274	Psat1
ENSMUSG00000026623	299.24	-0.77675	0.0100734	Lpgat1
ENSMUSG00000070343	1260.28	-0.776312	0.024075	Gm10288
ENSMUSG00000051278	43.2993	-0.776008	0.0278032	Zgrf1
ENSMUSG00000038510	127.305	-0.773123	0.0189393	Rpf2
ENSMUSG00000044221	169.481	-0.772976	0.0356434	Grsf1
ENSMUSG00000028367	671.648	-0.772463	0.00988161	Txn1
ENSMUSG00000018189	225.402	-0.770852	0.000170438	Uchl5
ENSMUSG00000072082	374.248	-0.769681	0.021122	Ccnf
ENSMUSG00000001436	156.579	-0.767858	0.00841073	Slc19a1
ENSMUSG00000006310	186.52	-0.766726	0.0365827	Zbtb32
ENSMUSG00000027011	106.768	-0.76389	0.0172113	Ube2e3
ENSMUSG00000042354	233.04	-0.761201	0.00285477	Gnl3
ENSMUSG00000030452	120.954	-0.76051	0.0179202	Nipa2
ENSMUSG00000079941	148.323	-0.757893	0.0279538	Gm11273
ENSMUSG00000028560	488.95	-0.757388	0.00496575	Usp1
ENSMUSG00000024666	66.3493	-0.753912	0.00905932	Tmem138
ENSMUSG00000024726	69.9249	-0.753799	0.00919691	2410127L17Rik
ENSMUSG00000057541	68.5615	-0.753418	0.039599	Pus7
ENSMUSG00000029591	295.154	-0.75272	0.0119709	Ung
ENSMUSG00000039016	591.192	-0.751978	0.0132918	Timm8b
ENSMUSG00000039221	1043.94	-0.74792	0.0350504	Rpl22l1
ENSMUSG00000024360	1188.35	-0.744986	0.00182266	Etf1
ENSMUSG00000029463	138.766	-0.742857	0.0296593	Fam216a
ENSMUSG00000028873	983.412	-0.741113	0.0490918	Cdca8
ENSMUSG00000021597	46.5346	-0.7399	0.0378126	Ankrd32
ENSMUSG00000055531	397.018	-0.738932	0.00806727	Cpsf6
ENSMUSG00000029486	110.003	-0.738919	0.0197574	Mrpl1
ENSMUSG00000040322	44.6258	-0.737754	0.0278032	Slc25a24
ENSMUSG00000032294	15814.3	-0.735607	0.0329447	Pkm
ENSMUSG00000040034	134.924	-0.735027	0.0353297	Nup43
ENSMUSG00000001228	407.867	-0.73273	0.0176889	Uhrf1
ENSMUSG00000033970	194.167	-0.731311	0.0242424	Rfc3
ENSMUSG00000026502	334.945	-0.728437	0.0165368	Desi2
ENSMUSG00000062908	62.0625	-0.726048	0.0309783	Acadm
ENSMUSG00000035356	231.5	-0.725373	0.0386836	Nfkbiz
ENSMUSG00000023067	188.33	-0.725097	0.0450053	Cdkn1a
ENSMUSG00000021938	76.4504	-0.724171	0.0196937	Pspc1
ENSMUSG00000027074	168.029	-0.722619	0.0199865	Slc43a3
ENSMUSG00000028494	197.824	-0.720805	0.0398073	Plin2
ENSMUSG00000031633	659.565	-0.720272	0.00841755	Slc25a4
ENSMUSG00000034593	88.6406	-0.7181	0.0193624	Myo5a
ENSMUSG00000036768	335.999	-0.717888	0.0366604	Kif15
ENSMUSG00000023015	670.045	-0.717533	0.0377057	Racgap1
ENSMUSG00000069135	79.2997	-0.714834	0.0134709	Fgfr1op
ENSMUSG00000028156	335.483	-0.713246	0.0340951	Eif4e
ENSMUSG00000030649	575.531	-0.711304	0.0236266	Anapc15
ENSMUSG00000021707	147.545	-0.710566	0.0149801	Dhfr
ENSMUSG00000046179	107.191	-0.709199	0.0432866	E2f8
ENSMUSG00000025464	128.753	-0.703221	0.0197574	Paox
ENSMUSG00000067995	191.925	-0.700836	0.0177092	Gtf2f2
ENSMUSG00000034203	287.076	-0.697702	0.0160116	Chchd4
ENSMUSG00000024800	156.251	-0.697417	0.00841676	Rpp30
ENSMUSG00000031016	53.2901	-0.694478	0.0300105	Wee1
ENSMUSG00000005233	305.756	-0.693782	0.0465535	Spc25
ENSMUSG00000051557	192.947	-0.693083	0.0471652	Pusl1
ENSMUSG00000031353	365.107	-0.691578	0.00450638	Rbbp7
ENSMUSG00000025555	196.765	-0.691385	0.0267834	Farp1
ENSMUSG00000020898	138.16	-0.691283	0.0330651	Ctc1
ENSMUSG00000025894	99.9203	-0.687798	0.0258788	Aasdhppt
ENSMUSG00000020280	96.2532	-0.687005	0.0265083	Pus10
ENSMUSG00000046434	873.323	-0.686012	0.0393054	Hnrnpa1
ENSMUSG00000028010	357.657	-0.685304	0.00873329	Gar1
ENSMUSG00000039231	588.952	-0.684386	0.0465342	Suv39h1
ENSMUSG00000083621	1068.14	-0.683545	0.0259076	Gm14586
ENSMUSG00000005846	363.407	-0.682462	0.0120779	Rsl1d1
ENSMUSG00000041238	148.169	-0.681902	0.00537913	Rbbp8
ENSMUSG00000038388	248.164	-0.681363	0.0380507	Mpp6
ENSMUSG00000017286	138.059	-0.680654	0.0117337	Glod4
ENSMUSG00000062619	165.228	-0.678324	0.0498461	2310039H08Rik
ENSMUSG00000038628	129.386	-0.67791	0.0282019	Polr3k
ENSMUSG00000018509	100.1	-0.677305	0.0258788	Cenpv
ENSMUSG00000078812	7503.21	-0.677081	0.0484119	Eif5a
ENSMUSG00000019689	366.449	-0.674167	0.0257015	1110001J03Rik
ENSMUSG00000076437	1493.4	-0.673847	0.0246248	2700094K13Rik
ENSMUSG00000042210	110.737	-0.66953	0.0197351	Abhd14a
ENSMUSG00000024785	131.638	-0.668726	0.0197574	Rcl1
ENSMUSG00000026687	179.536	-0.666994	0.0289263	Aldh9a1
ENSMUSG00000027108	599.149	-0.665719	0.000244626	Ola1
ENSMUSG00000000787	1613.22	-0.665718	0.0261004	Ddx3x
ENSMUSG00000012443	260.541	-0.663794	0.0261004	Kif11
ENSMUSG00000000339	360.124	-0.661895	0.042275	Rtca
ENSMUSG00000058704	151.146	-0.656345	0.0342161	Memo1
ENSMUSG00000038047	83.8837	-0.655815	0.0430903	Haus6
ENSMUSG00000027306	385.476	-0.655662	0.0314879	Nusap1
ENSMUSG00000034424	79.8489	-0.654184	0.038902	Gcsh
ENSMUSG00000085156	59.642	-0.651425	0.028124	Gm11974
ENSMUSG00000048707	64.4819	-0.651001	0.0187813	Tprn
ENSMUSG00000037572	307.127	-0.649989	0.00672666	Wdhd1
ENSMUSG00000021048	353.223	-0.649165	0.0100732	Mthfd1
ENSMUSG00000017548	223.208	-0.647993	0.0196804	Suz12
ENSMUSG00000026355	1986.76	-0.647701	0.0390888	Mcm6
ENSMUSG00000021774	165.26	-0.645848	0.0428626	Ube2e1
ENSMUSG00000033166	89.4183	-0.644331	0.0473098	Dis3
ENSMUSG00000020739	336.45	-0.64424	0.021818	Nup85
ENSMUSG00000059586	449.631	-0.638632	0.00905932	Nsmce2
ENSMUSG00000035443	253.564	-0.637859	0.00982085	Thyn1
ENSMUSG00000021417	243.862	-0.637411	0.0223159	Eci2
ENSMUSG00000024772	598.607	-0.634248	0.0248063	Ehd1
ENSMUSG00000031781	486.457	-0.633087	0.0351813	Ciapin1
ENSMUSG00000014226	200.536	-0.62876	0.0309849	Cacybp
ENSMUSG00000006906	119.485	-0.627783	0.00418966	Stambp
ENSMUSG00000004264	1521.09	-0.627684	0.0257015	Phb2
ENSMUSG00000033047	1330.37	-0.627576	0.00976245	Eif3l
ENSMUSG00000020978	128.027	-0.624484	0.0154004	Klhdc2
ENSMUSG00000026491	137.524	-0.623353	0.0301185	Ahctf1
ENSMUSG00000038718	74.5742	-0.621809	0.03429	Pbx3
ENSMUSG00000020650	110.6	-0.620914	0.0156408	Bcap29
ENSMUSG00000027018	337.882	-0.619211	0.0238932	Hat1
ENSMUSG00000019977	299.126	-0.618986	0.010966	Hbs1l
ENSMUSG00000020741	429.492	-0.618449	0.0154004	Cluh
ENSMUSG00000020687	172.164	-0.615589	0.00905932	Cdc27
ENSMUSG00000021929	303.006	-0.614233	0.00326207	Kpna3
ENSMUSG00000045827	316.448	-0.613911	0.0333225	Serpinb9
ENSMUSG00000041353	113.081	-0.611148	0.0328451	Tmem29
ENSMUSG00000021270	3871.34	-0.607949	0.00873864	Hsp90aa1
ENSMUSG00000030102	362.042	-0.603111	0.00444746	Itpr1
ENSMUSG00000038736	67.9241	-0.603041	0.0378126	Nudcd1
ENSMUSG00000030127	167.963	-0.600599	0.00300964	Cops7a
ENSMUSG00000096199	119.445	-0.600228	0.0384824	Ptrhd1
ENSMUSG00000006526	111.644	-0.5996	0.0336973	Tmem110
ENSMUSG00000006998	2528.1	-0.594538	0.016659	Psmd2
ENSMUSG00000031754	145.563	-0.593589	0.0300105	Nudt21
ENSMUSG00000033596	408.599	-0.593251	0.0216711	Rfwd3
ENSMUSG00000056076	1819.27	-0.59142	0.0161036	Eif3b
ENSMUSG00000028688	186.395	-0.590947	0.041513	Toe1
ENSMUSG00000026434	1844.37	-0.589677	0.00370496	Nucks1
ENSMUSG00000020287	263.774	-0.587732	0.0473098	Mpg
ENSMUSG00000025980	653.007	-0.585083	0.0465535	Hspd1
ENSMUSG00000025917	375.66	-0.577743	0.0150353	Cops5
ENSMUSG00000061559	184.884	-0.575496	0.0461935	Wdr61
ENSMUSG00000061024	167.158	-0.575306	0.00902317	Rrs1
ENSMUSG00000021748	771.503	-0.572614	0.0241273	Pdhb
ENSMUSG00000027133	1933.12	-0.572573	0.0309849	Nop10
ENSMUSG00000067194	465.292	-0.571558	0.0259491	Eif1ax
ENSMUSG00000061983	20535.8	-0.570439	0.0279538	Rps12
ENSMUSG00000001666	500.818	-0.569836	0.0188022	Ddt
ENSMUSG00000058470	997.55	-0.569492	0.0083398	Gm8369
ENSMUSG00000031358	155.132	-0.566828	0.0145356	Msl3
ENSMUSG00000040025	372.872	-0.565837	0.0446079	Ythdf2
ENSMUSG00000031256	163.77	-0.565163	0.00982085	Cstf2
ENSMUSG00000025791	161.08	-0.562823	0.0367563	Pgm2
ENSMUSG00000015749	1029.67	-0.562494	0.0189811	Anp32e
ENSMUSG00000042305	222.614	-0.561996	0.0261004	Tmem183a
ENSMUSG00000029447	712.583	-0.556202	0.00884872	Cct6a
ENSMUSG00000072582	152.187	-0.554839	0.0476659	Ptrh2
ENSMUSG00000004897	2421.79	-0.551911	0.0442244	Hdgf
ENSMUSG00000029642	1683.25	-0.549785	0.0253164	Polr1d
ENSMUSG00000021832	358.785	-0.548799	0.0200569	Psmc6
ENSMUSG00000020290	635.469	-0.546093	0.0334094	Xpo1
ENSMUSG00000054766	1537.44	-0.545295	0.0236266	Set
ENSMUSG00000063800	262.902	-0.543582	0.0117337	Prpf38a
ENSMUSG00000060904	95.9406	-0.543378	0.042275	Arl1
ENSMUSG00000024067	458.147	-0.535336	0.0316852	Dpy30
ENSMUSG00000021326	525.841	-0.533014	0.0259804	Trim27
ENSMUSG00000026009	3426.96	-0.528345	0.0179896	Icos
ENSMUSG00000021116	374.225	-0.523125	0.0483432	Eif2s1
ENSMUSG00000085531	130.138	-0.519449	0.0261004	Slc36a3os
ENSMUSG00000047879	305.172	-0.515775	0.0211743	Usp14
ENSMUSG00000020022	855.625	-0.509886	0.00486695	Ndufa12
ENSMUSG00000035790	131.686	-0.506006	0.0314879	Cep19
ENSMUSG00000025534	348.53	-0.505424	0.00787604	Gusb

## Sheet: D7 KO UP
Geneid	baseMean	log2FoldChange	padj	gene_name
ENSMUSG00000017737	22.8476	3.10149	8.17e-05	Mmp9
ENSMUSG00000041707	23.6762	2.95255	9.22e-06	1810011H11Rik
ENSMUSG00000113669	43.9532	2.73899	3.27e-07	NA
ENSMUSG00000076757	100.234	2.64093	1.34e-06	Tcrg-C4
ENSMUSG00000052374	26.1689	2.53149	2.93e-05	Actn2
ENSMUSG00000066687	66.7279	2.52699	3.64e-11	Zbtb16
ENSMUSG00000051354	22.3364	2.51088	3.16e-06	Samd3
ENSMUSG00000006800	25.4204	2.40742	1.28e-06	Sulf2
ENSMUSG00000042284	38.6015	2.38811	1.65e-05	Itga1
ENSMUSG00000076749	89.3541	2.26183	0.00102596	Tcrg-C1
ENSMUSG00000021983	49.7521	2.23216	1.12e-10	Atp8a2
ENSMUSG00000074063	29.1853	2.20585	0.00122995	Osgin1
ENSMUSG00000032204	21.6528	2.13027	0.000358348	Aqp9
ENSMUSG00000076752	72.715	2.10219	4.15e-05	Tcrg-C2
ENSMUSG00000015476	153.853	2.09631	3.64e-11	Prrt1
ENSMUSG00000061577	165.544	2.06834	2.93e-05	Gpr114
ENSMUSG00000045777	69.6041	2.0652	0.000167782	Ifitm10
ENSMUSG00000027435	21.4488	1.94974	0.00158687	Cd93
ENSMUSG00000038560	21.5982	1.91842	0.00203882	Sp6
ENSMUSG00000001270	58.8667	1.89853	1.37e-05	Ckb
ENSMUSG00000006342	20.0901	1.86024	0.00139458	Susd2
ENSMUSG00000032690	38.6547	1.85356	0.010966	Oas2
ENSMUSG00000043953	28.1813	1.85093	0.000293066	Ccrl2
ENSMUSG00000048534	56.7328	1.83582	2.52e-09	Amica1
ENSMUSG00000041460	26.9716	1.80172	1.29e-05	Cacna2d4
ENSMUSG00000035042	2113.63	1.79149	0.000124168	Ccl5
ENSMUSG00000062488	51.2417	1.78526	0.00485908	I830012O16Rik
ENSMUSG00000034459	336.748	1.77676	0.000734251	Ifit1
ENSMUSG00000028459	33.1451	1.73934	0.00100993	Cd72
ENSMUSG00000049103	195.515	1.73611	0.00024667	Ccr2
ENSMUSG00000024910	403.833	1.73252	0.00553211	Ctsw
ENSMUSG00000034353	109.625	1.72575	8.49e-05	Ramp1
ENSMUSG00000030149	89.7895	1.71458	1.34e-06	Klrk1
ENSMUSG00000020520	156.263	1.70561	0.000194829	Galnt10
ENSMUSG00000039521	389.707	1.69367	5.38e-07	Foxp3
ENSMUSG00000017493	42.2152	1.69261	7.76e-05	Igfbp4
ENSMUSG00000051314	47.0666	1.68892	0.00712677	Ffar2
ENSMUSG00000032578	117.198	1.68448	1.64e-06	Cish
ENSMUSG00000050777	25.1329	1.61583	0.00100993	Tmem37
ENSMUSG00000040721	390.878	1.60903	0.00107233	Zfhx2
ENSMUSG00000030114	175.398	1.60746	0.000455061	Klrg1
ENSMUSG00000023341	37.533	1.60592	0.0262827	Mx2
ENSMUSG00000052336	55.4037	1.59404	0.0286055	Cx3cr1
ENSMUSG00000033209	56.203	1.592	5.38e-07	Ttc28
ENSMUSG00000041827	86.006	1.58506	0.00143453	Oasl1
ENSMUSG00000121239	26.3412	1.58449	0.00252168	NA
ENSMUSG00000021200	585.566	1.57832	0.000191917	Asb2
ENSMUSG00000042759	97.2704	1.57818	0.000194829	Apobr
ENSMUSG00000026090	20.152	1.57741	0.000934121	2010300C02Rik
ENSMUSG00000043807	33.5664	1.56405	0.0056418	Ly6g5b
ENSMUSG00000000732	57.2185	1.56261	3.25e-07	Icosl
ENSMUSG00000015846	109.234	1.56149	0.00994502	Rxra
ENSMUSG00000106847	82.6788	1.56076	2.04e-05	NA
ENSMUSG00000028037	34.0761	1.53745	0.0185971	Ifi44
ENSMUSG00000025743	52.5419	1.53711	0.0360303	Sdc3
ENSMUSG00000121505	71.8774	1.52512	0.00350276	NA
ENSMUSG00000033446	84.8297	1.51937	0.00139458	Lpar6
ENSMUSG00000018378	32.6247	1.51492	0.000349927	Cuedc1
ENSMUSG00000074896	312.231	1.50176	0.0023164	Ifit3
ENSMUSG00000106734	256.037	1.48908	8.11e-05	NA
ENSMUSG00000042046	38.4024	1.48803	2.04e-05	Dstyk
ENSMUSG00000071724	77.9176	1.47086	1.45e-07	Smpd5
ENSMUSG00000020689	263.598	1.46911	5.24e-08	Itgb3
ENSMUSG00000035208	202.77	1.46371	9.76e-05	Slfn8
ENSMUSG00000043873	32.4806	1.4587	0.0294063	Chil5
ENSMUSG00000052544	33.2417	1.45023	0.000168063	St6galnac3
ENSMUSG00000029603	1157.84	1.44428	0.00326207	Dtx1
ENSMUSG00000029530	40.8577	1.44252	0.00228286	Ccr9
ENSMUSG00000029561	235.929	1.43101	0.00249027	Oasl2
ENSMUSG00000095041	1172	1.42991	0.0313025
ENSMUSG00000029810	49.8793	1.42715	3.16e-06	Tmem176b
ENSMUSG00000053835	30.3102	1.4215	0.0309849	H2-T24
ENSMUSG00000001288	33.2807	1.41426	0.00100993	Rarg
ENSMUSG00000002233	97.9654	1.40963	0.00144786	Rhoc
ENSMUSG00000092517	110.69	1.40607	0.00326207	Art2a-ps
ENSMUSG00000040061	137.728	1.40378	0.00412701	Plcb2
ENSMUSG00000070327	1486.11	1.39756	0.0251537	Rnf213
ENSMUSG00000073491	404.054	1.39539	0.00759717	Pydc4
ENSMUSG00000035692	699.954	1.39258	0.0259076	Isg15
ENSMUSG00000039982	52.4253	1.38941	0.000157867	Dtx4
ENSMUSG00000030107	155.381	1.38892	0.00631783	Usp18
ENSMUSG00000032528	25.2747	1.38466	0.0426312	Vipr1
ENSMUSG00000111118	26.7214	1.38459	0.00441224	NA
ENSMUSG00000018381	98.7434	1.37878	0.015277	Abi3
ENSMUSG00000079505	62.6064	1.36702	0.00016365	Gm11131
ENSMUSG00000004263	226.774	1.36339	0.00905932	Atn1
ENSMUSG00000046668	33.9378	1.3525	0.000666983	Cxxc5
ENSMUSG00000070501	77.0788	1.34912	0.0262827	BC094916
ENSMUSG00000020889	23.4663	1.3479	0.00956204	Nr1d1
ENSMUSG00000032733	44.3159	1.33122	2.93e-05	Snx33
ENSMUSG00000039943	29.8634	1.33095	0.0225522	Plcb4
ENSMUSG00000043794	99.6308	1.3298	0.00905932	D830025C05Rik
ENSMUSG00000121500	79.4593	1.32507	0.0487497	NA
ENSMUSG00000020641	144.736	1.32432	0.00267167	Rsad2
ENSMUSG00000046447	23.4829	1.31861	0.0128173	Camk2n1
ENSMUSG00000044550	27.2393	1.30437	0.00841073	Tceal3
ENSMUSG00000039899	104.863	1.29416	0.0334533	Fgl2
ENSMUSG00000002578	51.3662	1.29041	0.000344687	Ikzf4
ENSMUSG00000023367	28.9935	1.29011	0.0258035	Tmem176a
ENSMUSG00000029798	115.059	1.28859	0.00136678	Herc6
ENSMUSG00000020027	136.701	1.28493	0.00315322	Socs2
ENSMUSG00000037992	180.78	1.27488	0.00563951	Rara
ENSMUSG00000034586	42.6035	1.27046	0.01686	Hid1
ENSMUSG00000031932	77.9845	1.26722	8.05e-05	Gpr83
ENSMUSG00000025352	67.3341	1.26354	1.74e-05	Gdf11
ENSMUSG00000004633	101.058	1.25334	2.18e-05	Chn2
ENSMUSG00000053617	72.4847	1.25256	0.00149079	Sh3pxd2a
ENSMUSG00000054404	360.513	1.247	0.0184869	Slfn5
ENSMUSG00000068606	22.6587	1.24013	0.00827217	Gm4841
ENSMUSG00000034438	96.41	1.23882	0.033966	Gbp8
ENSMUSG00000097993	46.592	1.23701	0.0309367	Ptprv
ENSMUSG00000032220	46.0508	1.23154	0.0017322	Myo1e
ENSMUSG00000037921	82.0352	1.22844	0.000157867	Ddx60
ENSMUSG00000079563	460.381	1.22538	0.00131905	Pglyrp2
ENSMUSG00000068463	56.6043	1.22251	0.0363698	B630019A10Rik
ENSMUSG00000025408	183.779	1.2143	0.0352877	Ddit3
ENSMUSG00000006154	89.2648	1.20871	0.00382368	Eps8l1
ENSMUSG00000006587	38.7105	1.20672	0.0331209	Snai3
ENSMUSG00000029605	37.4247	1.20435	0.000122496	Oas1b
ENSMUSG00000040584	140.334	1.20218	0.000127645	Abcb1a
ENSMUSG00000045573	33.2306	1.19888	0.0185971	Penk
ENSMUSG00000028927	203.145	1.19564	0.00146912	Padi2
ENSMUSG00000039911	43.3161	1.19297	0.000198296	Spsb1
ENSMUSG00000032661	504.468	1.19106	0.00255624	Oas3
ENSMUSG00000025163	201.689	1.18616	0.00267167	Cd7
ENSMUSG00000048521	314.429	1.17805	0.0126347	Cxcr6
ENSMUSG00000026203	80.883	1.17682	0.010932	Dnajb2
ENSMUSG00000037129	40.2459	1.17603	0.0330651	Tmprss13
ENSMUSG00000090958	106.287	1.17498	0.000500138	Lrrc32
ENSMUSG00000038244	34.2963	1.17175	0.00265448	Mical2
ENSMUSG00000020623	37.7945	1.16849	0.00365093	Map2k6
ENSMUSG00000095174	71.0165	1.16603	0.021122	Gm20069
ENSMUSG00000063268	355.92	1.16511	0.0301988	Parp10
ENSMUSG00000029816	20.4524	1.16044	0.0408487	Gpnmb
ENSMUSG00000047180	125.495	1.15902	0.000167782	Neurl3
ENSMUSG00000032549	58.6444	1.14911	0.000561814	Rab6b
ENSMUSG00000035824	218.799	1.14497	0.000738034	Tk2
ENSMUSG00000024399	1296.36	1.14492	0.0473098	Ltb
ENSMUSG00000049866	1543.42	1.14483	2.32e-05	Arl4c
ENSMUSG00000024960	45.5823	1.13881	0.0298265	Plcb3
ENSMUSG00000068551	44.9976	1.13733	0.00304429	Zfp467
ENSMUSG00000034028	188.483	1.13624	0.0336973	Cd226
ENSMUSG00000017897	40.6924	1.13623	0.0129756	Eya2
ENSMUSG00000108560	43.7092	1.13082	0.033966	NA
ENSMUSG00000100280	56.8994	1.1285	0.0213262	Gm28417
ENSMUSG00000035891	52.6548	1.12272	0.000340051	Cerk
ENSMUSG00000038507	132.035	1.10576	0.00444746	Parp12
ENSMUSG00000078349	100.122	1.10535	0.000466833	AW011738
ENSMUSG00000022584	2471.71	1.10495	0.00159406	Ly6c2
ENSMUSG00000041481	903.769	1.10307	0.00107233	Serpina3g
ENSMUSG00000066621	1102.25	1.10305	0.00328578	Tecpr1
ENSMUSG00000020886	83.3784	1.10191	0.0153003	Dlg4
ENSMUSG00000070803	20.1548	1.10135	0.0149342	Cited4
ENSMUSG00000070315	52.4144	1.10055	0.0300105	4930581F22Rik
ENSMUSG00000044770	96.5603	1.09818	0.000987394	Scml4
ENSMUSG00000066363	156.396	1.09813	0.000344687	Serpina3f
ENSMUSG00000032750	62.5253	1.09725	0.00154245	Gab3
ENSMUSG00000027646	42.3839	1.09641	0.00784954	Src
ENSMUSG00000034522	182.629	1.09589	0.0149342	Zfp395
ENSMUSG00000030699	38.3126	1.09473	0.0129175	Tbx6
ENSMUSG00000057637	565.936	1.09059	0.00971884	Prdm2
ENSMUSG00000015340	145.677	1.08943	0.000255618	Cybb
ENSMUSG00000024193	339.801	1.08804	0.000157867	Phf1
ENSMUSG00000046329	81.5031	1.08375	6.79e-05	Slc25a23
ENSMUSG00000024074	171.853	1.08215	9.76e-05	Crim1
ENSMUSG00000042613	738.807	1.08031	0.0353297	Pbxip1
ENSMUSG00000006362	32.7628	1.07651	0.0103414	Cbfa2t3
ENSMUSG00000031217	20.8961	1.07594	0.0248063	Efnb1
ENSMUSG00000030798	1680	1.07161	0.000934121	Cd37
ENSMUSG00000040296	347.091	1.06941	0.0017963	Ddx58
ENSMUSG00000022708	313.531	1.05964	0.000146106	Zbtb20
ENSMUSG00000028063	25.6711	1.05793	0.0482213	Lmna
ENSMUSG00000058318	315.675	1.05768	0.000472469	Phf21a
ENSMUSG00000097327	34.7752	1.0555	0.0143421	E030030I06Rik
ENSMUSG00000063177	21.0988	1.05485	0.0351813	Klk1b27
ENSMUSG00000022479	31.6612	1.05446	0.0103162	Vdr
ENSMUSG00000033470	101.921	1.05426	8.17e-05	Cysltr2
ENSMUSG00000097729	50.0799	1.05425	0.0442244	2310015A10Rik
ENSMUSG00000053541	171.845	1.05366	0.0261004	Gm4759
ENSMUSG00000097060	31.4288	1.05239	0.0321265	Gm26759
ENSMUSG00000063146	74.2214	1.04595	0.00744329	Clip2
ENSMUSG00000032265	132.042	1.04355	0.000167782	Fam46a
ENSMUSG00000052609	35.4372	1.04239	0.0286055	Plekhg3
ENSMUSG00000000184	3052.66	1.03977	1.23e-05	Ccnd2
ENSMUSG00000024921	438.743	1.03636	0.0435192	Smarca2
ENSMUSG00000042675	1321.27	1.03214	0.000455061	Ypel3
ENSMUSG00000086564	20.6059	1.03077	0.0258035	Cd101
ENSMUSG00000029166	54.8675	1.02696	0.000934121	Mapre3
ENSMUSG00000036959	28.7068	1.025	0.0117208	Bcorl1
ENSMUSG00000059810	412.215	1.02236	0.0213262	Rgs3
ENSMUSG00000029060	83.4384	1.02178	0.00205011	Mib2
ENSMUSG00000066677	330.916	1.01701	0.0373203	Pydc3
ENSMUSG00000039997	786.986	1.01633	0.00039104	Ifi203
ENSMUSG00000030930	60.858	1.01618	0.000655103	Chst15
ENSMUSG00000005951	24.3982	1.00332	0.0133643	Shpk
ENSMUSG00000017830	246.128	0.986884	0.0279538	Dhx58
ENSMUSG00000039304	60.8452	0.978121	0.0122136	Tnfsf10
ENSMUSG00000024079	154.435	0.977904	0.00710903	Eif2ak2
ENSMUSG00000059824	64.5685	0.977558	0.00457729	Dbp
ENSMUSG00000032216	33.1374	0.974456	0.0100189	Nedd4
ENSMUSG00000040913	67.3941	0.970771	0.0360303	Fbxw4
ENSMUSG00000002227	322.341	0.96878	0.000791558	Mov10
ENSMUSG00000047153	173.672	0.967956	0.001914	Khnyn
ENSMUSG00000039942	157.956	0.962125	0.00553211	Ptger4
ENSMUSG00000000791	210.363	0.961333	0.0381688	Il12rb1
ENSMUSG00000066258	509.778	0.960558	0.00542891	Trim12a
ENSMUSG00000031327	57.5591	0.958657	0.0378126	Chic1
ENSMUSG00000043263	487.934	0.958498	0.0351813	Pyhin1
ENSMUSG00000000631	288.212	0.958048	0.0416173	Myo18a
ENSMUSG00000016758	28.0806	0.954568	0.029325	Bik
ENSMUSG00000057596	116.406	0.951773	0.0154004	Trim30d
ENSMUSG00000072770	66.947	0.950753	0.0133643	Acrbp
ENSMUSG00000054072	307.637	0.950739	0.00205146	Iigp1
ENSMUSG00000046574	380.747	0.950212	0.00410392	Prr12
ENSMUSG00000078670	44.4791	0.946601	0.00873864	Fam174b
ENSMUSG00000120697	161.124	0.946481	0.00760644	NA
ENSMUSG00000025498	1108.76	0.942125	0.0279538	Irf7
ENSMUSG00000008999	102.519	0.94008	0.0253955	Bmp7
ENSMUSG00000104213	31.7471	0.93877	0.0444258	Ighd
ENSMUSG00000027514	569.278	0.933136	0.0140224	Zbp1
ENSMUSG00000002763	153.31	0.930235	0.0117208	Pex6
ENSMUSG00000034422	340.378	0.919313	0.00670826	Parp14
ENSMUSG00000047735	176.33	0.915965	0.00493508	Samd9l
ENSMUSG00000086481	39.5129	0.914624	0.0491917	Gm11707
ENSMUSG00000038976	739.728	0.907815	0.000284629	Ppp1r9b
ENSMUSG00000040483	78.0288	0.90687	0.0435192	Xaf1
ENSMUSG00000021756	744.158	0.904692	0.00384905	Il6st
ENSMUSG00000034220	93.4393	0.902987	0.0044815	Gpc1
ENSMUSG00000041096	83.0442	0.895904	0.0286055	Tspyl2
ENSMUSG00000038302	41.5578	0.894577	0.03952	Lace1
ENSMUSG00000119959	43.1712	0.893565	0.0469718	NA
ENSMUSG00000031428	57.985	0.893558	0.0114257	Zcchc18
ENSMUSG00000043384	55.3716	0.89351	0.0259076	Gprasp1
ENSMUSG00000039236	570.368	0.891853	0.0261004	Isg20
ENSMUSG00000112023	39.7181	0.888805	0.048829	NA
ENSMUSG00000121503	245.327	0.888631	0.010932	NA
ENSMUSG00000058756	84.8717	0.887759	0.0344834	Thra
ENSMUSG00000051285	130.43	0.886985	0.0155824	Pcmtd1
ENSMUSG00000024462	59.0878	0.884501	0.0302241	Gabbr1
ENSMUSG00000040033	331.865	0.883591	0.00350716	Stat2
ENSMUSG00000032596	589.949	0.883176	0.00964553	Uba7
ENSMUSG00000032386	185.858	0.879548	0.0154004	Trip4
ENSMUSG00000120140	376.447	0.877237	0.0122136	NA
ENSMUSG00000033540	140.195	0.876006	0.000157867	Idua
ENSMUSG00000043924	45.3102	0.875729	0.0486795	Ncmap
ENSMUSG00000116220	58.4497	0.875707	0.00905932	NA
ENSMUSG00000044345	107.365	0.874123	0.0342639	Marveld1
ENSMUSG00000104876	110.433	0.87224	0.00565802	NA
ENSMUSG00000085028	118.65	0.869311	0.0242424	Slc2a4rg-ps
ENSMUSG00000029570	4898.66	0.865018	0.0328451	Lfng
ENSMUSG00000039087	41.4339	0.863569	0.0273742	Rreb1
ENSMUSG00000035929	205.814	0.86281	0.014198	H2-Q4
ENSMUSG00000034177	43.2421	0.862472	0.0483432	Rnf43
ENSMUSG00000031304	4064.8	0.862106	0.00147576	Il2rg
ENSMUSG00000091144	458.298	0.861756	0.0148691	Phf11c
ENSMUSG00000026104	2414.91	0.859186	0.0397005	Stat1
ENSMUSG00000066278	256.337	0.856233	0.0103162	Vps37b
ENSMUSG00000020432	59.7575	0.853517	0.0305326	Tcn2
ENSMUSG00000078763	2054.95	0.851105	0.000455061	Slfn1
ENSMUSG00000073096	80.8948	0.849393	0.000944491	Lrrc61
ENSMUSG00000028104	184.344	0.84081	0.00569369	Polr3gl
ENSMUSG00000046718	355.351	0.840039	0.0350504	Bst2
ENSMUSG00000048852	25.0503	0.835617	0.0439277	Gm12185
ENSMUSG00000005442	1087.34	0.833412	0.0282263	Cic
ENSMUSG00000037685	123.976	0.824253	0.00905932	Atp8a1
ENSMUSG00000029098	163.451	0.822072	0.0269936	Acox3
ENSMUSG00000032285	56.8716	0.815722	0.028182	Dnaja4
ENSMUSG00000052512	175.086	0.815528	0.0317421	Nav2
ENSMUSG00000079017	9802.61	0.814901	0.0351813	Ifi27l2a
ENSMUSG00000079227	171.328	0.814786	0.0373203	Ccr5
ENSMUSG00000037243	64.3144	0.810918	0.0220972	Zfp692
ENSMUSG00000037553	1270.91	0.805684	0.0444917	Zdhhc18
ENSMUSG00000086652	84.8093	0.803601	0.00528063	Gm14029
ENSMUSG00000032175	325.594	0.802278	0.00164535	Tyk2
ENSMUSG00000025810	606.508	0.801043	0.0212519	Nrp1
ENSMUSG00000027347	849.097	0.800962	0.0193624	Rasgrp1
ENSMUSG00000062761	153.754	0.800733	0.0266863	Zfp512
ENSMUSG00000047415	251.602	0.797038	0.0422779	Gpr68
ENSMUSG00000024019	50.1595	0.796634	0.0283674	Cmtr1
ENSMUSG00000071757	380.667	0.794326	0.00670826	Zhx2
ENSMUSG00000022946	188.457	0.789794	0.00257151	Dopey2
ENSMUSG00000049502	857.603	0.787434	0.0248063	Dtx3l
ENSMUSG00000018909	149.521	0.782396	0.0320045	Arrb1
ENSMUSG00000106205	46.567	0.772977	0.047538	NA
ENSMUSG00000022102	1111.84	0.768297	0.0197574	Dok2
ENSMUSG00000029149	39.3998	0.765275	0.0347783	Krtcap3
ENSMUSG00000032855	139.259	0.759371	0.025429	Pkd1
ENSMUSG00000023947	446.272	0.757415	0.00307856	Nfkbie
ENSMUSG00000030748	261.086	0.756775	0.0439028	Il4ra
ENSMUSG00000056498	482.921	0.755855	0.00282738	Tmem154
ENSMUSG00000010751	68.0022	0.753173	0.0156755	Tnfrsf22
ENSMUSG00000087259	86.5542	0.751483	0.00623837	2610035D17Rik
ENSMUSG00000025809	3140.68	0.749817	0.0442244	Itgb1
ENSMUSG00000000486	2962.02	0.748583	0.0191578	2025-09-01
ENSMUSG00000015944	58.2657	0.747334	0.0334094	Gatsl2
ENSMUSG00000062526	122.443	0.745995	0.0241273	Mppe1
ENSMUSG00000025880	97.9568	0.740661	0.0203463	Smad7
ENSMUSG00000031996	510.874	0.737949	0.000358348	Aplp2
ENSMUSG00000022014	582.05	0.737938	0.0473098	Epsti1
ENSMUSG00000040270	174.787	0.736742	0.0100189	Bach2
ENSMUSG00000037405	428.88	0.735074	0.0230484	Icam1
ENSMUSG00000035845	83.7928	0.733595	0.0373203	Alg12
ENSMUSG00000103089	67.2663	0.732776	0.0432311	RP23-59N15.2
ENSMUSG00000002325	513.84	0.73128	0.00135715	Irf9
ENSMUSG00000048756	115.315	0.726204	0.0298292	Foxo3
ENSMUSG00000059895	784.113	0.724771	0.0248063	Ptp4a3
ENSMUSG00000022657	451.101	0.724491	0.0367401	Cd96
ENSMUSG00000092564	56.0073	0.724247	0.0474577	BC051226
ENSMUSG00000045038	120.576	0.721464	0.0294063	Prkce
ENSMUSG00000037486	281.869	0.719504	0.0307225	Asxl2
ENSMUSG00000026851	392.341	0.71661	0.0141167	BC005624
ENSMUSG00000040746	863.125	0.71526	0.0347783	Rnf167
ENSMUSG00000028599	250.106	0.71429	0.00261983	Tnfrsf1b
ENSMUSG00000030123	46.544	0.713977	0.037244	Plxnd1
ENSMUSG00000086533	191.551	0.712986	0.0354136	Mypopos
ENSMUSG00000057137	94.1423	0.712156	0.0466456	Tmem140
ENSMUSG00000037148	297.45	0.711218	0.0350354	Arhgap10
ENSMUSG00000034255	284.73	0.710142	0.000167782	Arhgap27
ENSMUSG00000032812	96.1426	0.709704	0.0334094	Arap1
ENSMUSG00000063382	475.918	0.709507	0.033966	Bcl9l
ENSMUSG00000020042	182.584	0.705292	0.0340951	Btbd11
ENSMUSG00000037946	102.397	0.704181	0.0063327	Fgd3
ENSMUSG00000028458	133.246	0.703014	0.0400243	Tesk1
ENSMUSG00000020101	1297.21	0.701553	0.00401182	4632428N05Rik
ENSMUSG00000050357	437.001	0.700054	0.0177279	Rltpr
ENSMUSG00000024180	97.838	0.698781	0.0273742	Tmem8
ENSMUSG00000078994	58.4275	0.693576	0.0460463	Zfp429
ENSMUSG00000054892	202.646	0.692733	0.0122136	Txk
ENSMUSG00000026080	150.598	0.692421	0.0238982	Chst10
ENSMUSG00000042903	450.581	0.692226	0.00595573	Foxo4
ENSMUSG00000020868	217.559	0.691596	0.0482213	Xylt2
ENSMUSG00000001123	2059.33	0.691317	0.0302241	Lgals9
ENSMUSG00000027639	1570.84	0.686758	0.0329736	Samhd1
ENSMUSG00000025647	14958.5	0.685327	0.00232953	Shisa5
ENSMUSG00000121066	386.76	0.68525	0.0265083	NA
ENSMUSG00000048120	93.6888	0.684212	0.0465342	Entpd1
ENSMUSG00000019699	67.1235	0.684201	0.00964553	Akt3
ENSMUSG00000071068	165.746	0.682554	0.0120942	Treml2
ENSMUSG00000048249	155.091	0.681645	0.00860814	Crebrf
ENSMUSG00000009995	99.2516	0.675656	0.0142612	Taz
ENSMUSG00000041477	179.143	0.668095	0.00763914	Dcp1b
ENSMUSG00000036948	260.708	0.66431	0.018908	BC037034
ENSMUSG00000036644	239.096	0.664212	0.0126347	Tbc1d9b
ENSMUSG00000041954	1144.84	0.663946	0.0140887	Tnfrsf18
ENSMUSG00000019726	172.391	0.662221	0.0354059	Lyst
ENSMUSG00000010609	1134.97	0.657564	0.0260283	Psen2
ENSMUSG00000044167	689.772	0.654978	0.00472838	Foxo1
ENSMUSG00000027244	280.83	0.654161	0.00457729	Atg13
ENSMUSG00000004707	284.248	0.653466	0.0232277	Ly9
ENSMUSG00000081769	63.0383	0.653058	0.039599	Gm12216
ENSMUSG00000059555	88.0866	0.651779	0.0133643	Tor4a
ENSMUSG00000015291	254.63	0.647664	0.0220972	Gdi1
ENSMUSG00000033004	912.297	0.647518	0.0277252	Mycbp2
ENSMUSG00000032329	162.336	0.647447	0.0186108	Hmg20a
ENSMUSG00000022791	366.594	0.644127	0.0351813	Tnk2
ENSMUSG00000028649	798.801	0.643176	0.045628	Macf1
ENSMUSG00000039157	509.885	0.638833	0.00443232	Fam102a
ENSMUSG00000034673	344.581	0.638752	0.00908692	Pbx2
ENSMUSG00000048163	2794.41	0.637436	0.0140224	Selplg
ENSMUSG00000033781	82.4685	0.636407	0.0335859	Asb13
ENSMUSG00000015377	89.3952	0.635257	0.0236266	Dennd6b
ENSMUSG00000003363	479.793	0.630681	0.0191812	Pld3
ENSMUSG00000039264	7494.7	0.629966	0.00932505	Gimap3
ENSMUSG00000029050	889.498	0.629769	0.00905932	Ski
ENSMUSG00000034863	105.734	0.627539	0.0435192	Ano8
ENSMUSG00000015396	131.512	0.62513	0.0439277	Cd83
ENSMUSG00000076441	1847.21	0.616446	0.0421258	Ass1
ENSMUSG00000060477	107.692	0.615011	0.0337861	Irak2
ENSMUSG00000030720	201.539	0.611633	0.0300246	Cln3
ENSMUSG00000026519	225.212	0.611233	0.0484119	Tmem63a
ENSMUSG00000054792	159.134	0.609323	0.0343484	Klhl18
ENSMUSG00000001089	138.038	0.607818	0.0328063	Luzp1
ENSMUSG00000040253	968.615	0.60721	0.00791426	Gbp7
ENSMUSG00000053483	83.8503	0.605576	0.0484119	Usp21
ENSMUSG00000013033	498.734	0.603674	0.0329447	Lphn1
ENSMUSG00000036986	691.322	0.602946	0.0131195	Pml
ENSMUSG00000044465	208.433	0.600012	0.0450053	Fam160a2
ENSMUSG00000034312	115.705	0.599236	0.0296327	Iqsec1
ENSMUSG00000037235	1192.73	0.597101	0.0256938	Mxd4
ENSMUSG00000033880	1743.3	0.595563	0.0196949	Lgals3bp
ENSMUSG00000018931	91.1759	0.595426	0.0261004	Natd1
ENSMUSG00000052142	1128.09	0.594005	0.0498123	Rasal3
ENSMUSG00000028073	272.448	0.59398	0.00441304	Pear1
ENSMUSG00000042644	333.673	0.592686	0.00784954	Itpr3
ENSMUSG00000025212	304.452	0.59232	0.0328451	Sfxn3
ENSMUSG00000026600	89.8453	0.589557	0.0444917	Soat1
ENSMUSG00000022521	329.274	0.579068	0.010966	Crebbp
ENSMUSG00000037652	202.916	0.576754	0.0317421	Phc3
ENSMUSG00000041354	333.245	0.570343	0.0439028	Rgl2
ENSMUSG00000021819	222.822	0.568898	0.0231396	Zswim8
ENSMUSG00000019066	89.2952	0.566698	0.0152681	Rab3d
ENSMUSG00000026102	365.019	0.566247	0.0478993	Inpp1
ENSMUSG00000028854	186.574	0.564229	0.00356144	Slc9a1
ENSMUSG00000033350	227.669	0.564064	0.0140887	Chst2
ENSMUSG00000005142	1654.06	0.5626	0.0253164	Man2b1
ENSMUSG00000037622	404.203	0.561374	0.0267834	Wdtc1
ENSMUSG00000055675	1273.16	0.560594	0.00884872	Kbtbd11
ENSMUSG00000024793	305.093	0.558449	0.0219239	Tnfrsf25
ENSMUSG00000042608	300.992	0.558261	0.0186701	Stk40
ENSMUSG00000038387	193.951	0.553031	0.0334354	Rras
ENSMUSG00000041025	184.49	0.552002	0.0338364	Iffo2
ENSMUSG00000028163	362.732	0.54872	0.0428626	Nfkb1
ENSMUSG00000070034	2237.72	0.548388	0.025429	Sp110
ENSMUSG00000060657	260.316	0.541178	0.017751	Marf1
ENSMUSG00000022952	508.934	0.538041	0.0204757	Runx1
ENSMUSG00000051735	1096.15	0.532563	0.0421258	Rinl
ENSMUSG00000036006	1282.78	0.529252	0.00585663	Fam65b
ENSMUSG00000039686	399.505	0.524009	0.0261004	Zer1
ENSMUSG00000006920	396.78	0.523054	0.018416	Ezh1
ENSMUSG00000028756	401.711	0.522921	0.014198	Pink1
ENSMUSG00000058761	251.288	0.511053	0.0279115	Rnf169
ENSMUSG00000020788	605.525	0.509758	0.0353601	Atp2a3
ENSMUSG00000078853	717.228	0.502374	0.0197574	Igtp
ENSMUSG00000075376	164.585	0.500468	0.037454	Rc3h2
ENSMUSG00000001418	553.975	0.50028	0.0460765	Glmp
