# Supplementary material for: Conditional T and NK cell antagonism by a giant and highly conserved orthopoxvirus virulence factor
Source: Research Square preprint supplement (doi:10.21203/rs.3.rs-8672980/v1), 2026-02-04
Supplement: Supplementary file 2 [file 6b34a98e20db5bcf4eeb53e6.xlsx]

## Sheet: WT UP
Geneid	baseMean	log2FoldChange	padj	gene_name
ENSMUSG00000069917	79.8296	-2.10562	0.000270831	Hba-a2
ENSMUSG00000120167	130.559	-2.04973	0.0336774	NA
ENSMUSG00000069919	115.568	-1.96066	0.019996	Hba-a1
ENSMUSG00000063524	52.2524	-1.62189	0.000216772	Eno1
ENSMUSG00000015120	35.4123	-1.58509	0.000151566	Ube2i
ENSMUSG00000119584	40206.7	-1.50659	0.000151566	NA
ENSMUSG00000120754	34.2751	-1.3537	0.0124292	NA
ENSMUSG00000001642	59.0571	-1.34573	0.00537514	Akr1b3
ENSMUSG00000078695	27.9406	-1.28193	0.00696625	Cisd3
ENSMUSG00000003429	450.409	-1.2385	0.00987833	Rps11
ENSMUSG00000020211	298.527	-1.20933	0.000943092	Sf3a2
ENSMUSG00000061479	98.103	-1.19723	0.000343717	Snrpa
ENSMUSG00000036835	31.439	-1.15408	0.0206626	Psenen
ENSMUSG00000024875	81.0299	-1.15157	0.00562287	Yif1a
ENSMUSG00000035673	192.605	-1.11352	0.0176906	Sbno2
ENSMUSG00000064492	35.1203	-1.07579	0.041077	Gm22060
ENSMUSG00000022769	59.5929	-1.06826	0.032945	Sdf2l1
ENSMUSG00000048758	81.3312	-1.06823	0.0401536	Rpl29
ENSMUSG00000023067	68.0779	-1.06118	0.0304203	Cdkn1a
ENSMUSG00000024169	53.7962	-1.03248	0.0108486	Ift140
ENSMUSG00000073448	43.8377	-1.0157	0.0224677	Gm10509
ENSMUSG00000033685	1415.71	-1.01503	0.000412227	Ucp2
ENSMUSG00000121093	27.1751	-1.00748	0.0408391	NA
ENSMUSG00000035202	267.15	-0.998155	0.0463833	Lars2
ENSMUSG00000024014	641.453	-0.980617	0.0032929	Pim1
ENSMUSG00000064339	45472.4	-0.980347	0.0126248	mt-Rnr2
ENSMUSG00000064351	2755.65	-0.974153	0.00492999	mt-Co1
ENSMUSG00000065799	126.913	-0.974066	0.00562287	Gm25517
ENSMUSG00000056310	37.6078	-0.96706	0.0336774	Tyw1
ENSMUSG00000073902	311.648	-0.954071	0.022119	Gm1966
ENSMUSG00000118084	146.843	-0.951393	0.0231698	NA
ENSMUSG00000022565	210.06	-0.949369	0.0404058	Plec
ENSMUSG00000029406	147.764	-0.926108	0.0150379	Pitpnm2
ENSMUSG00000058833	63.1081	-0.890769	0.0150379	2810428I15Rik
ENSMUSG00000028779	58.3698	-0.886159	0.0287572	Pef1
ENSMUSG00000076902	43.4106	-0.884374	0.0366857	Traj27
ENSMUSG00000002015	149.726	-0.879164	0.0150641	Bcap31
ENSMUSG00000079641	9768.77	-0.856519	0.0432938	Rpl39
ENSMUSG00000053044	2423.08	-0.846404	0.00538198	Cd8b1
ENSMUSG00000027907	37.6805	-0.834956	0.03133	S100a11
ENSMUSG00000063286	199.594	-0.831538	0.00308772	Gm8995
ENSMUSG00000051007	167.2	-0.829951	0.00537514	Pddc1
ENSMUSG00000030987	159.38	-0.818487	0.00492999	Stim1
ENSMUSG00000031328	823.075	-0.815289	0.0383325	Flna
ENSMUSG00000024308	1567.62	-0.809584	0.00492999	Tapbp
ENSMUSG00000031447	414.185	-0.803295	0.0256149	Lamp1
ENSMUSG00000025509	251.706	-0.802063	0.0165995	Pnpla2
ENSMUSG00000047423	100.165	-0.797345	0.0219338	AI837181
ENSMUSG00000104488	31.5696	-0.794588	0.0401536	RP23-328G14.2
ENSMUSG00000064210	62.4684	-0.792726	0.00492999	Ano6
ENSMUSG00000042507	43.5408	-0.789289	0.0436546	Elmsan1
ENSMUSG00000108633	114.986	-0.77752	0.0336774	NA
ENSMUSG00000031304	2592.55	-0.773996	0.00244046	Il2rg
ENSMUSG00000050002	275.323	-0.772493	0.000133479	Idnk
ENSMUSG00000028066	273.614	-0.767727	0.03133	Pmf1
ENSMUSG00000022587	4036.88	-0.762369	0.000412227	Ly6e
ENSMUSG00000028458	54.8821	-0.750384	0.0330659	Tesk1
ENSMUSG00000088185	33.2912	-0.744443	0.0399459	Scarna2
ENSMUSG00000020827	421.198	-0.73286	0.0383325	Mink1
ENSMUSG00000045128	3287.34	-0.731127	0.0346354	Rpl18a
ENSMUSG00000036931	188.46	-0.722134	0.00397111	Nfkbid
ENSMUSG00000020737	467.292	-0.716401	0.0191341	Hn1
ENSMUSG00000024953	198.985	-0.70925	0.0281599	Prdx5
ENSMUSG00000019461	142.025	-0.70758	0.045998	Plscr3
ENSMUSG00000025228	107.115	-0.703213	0.0191999	Actr1a
ENSMUSG00000048285	55.8543	-0.701343	0.0354678	Frmd6
ENSMUSG00000031781	117.992	-0.696711	0.0208137	Ciapin1
ENSMUSG00000029570	2422.62	-0.690107	0.00556239	Lfng
ENSMUSG00000001729	406.903	-0.686661	0.0142022	Akt1
ENSMUSG00000112627	57.9122	-0.682503	0.0304203	NA
ENSMUSG00000079018	2048.53	-0.673048	0.0353003	Ly6c1
ENSMUSG00000035885	673.27	-0.665955	0.0108486	Cox8a
ENSMUSG00000001424	332.094	-0.665759	0.0182442	Snd1
ENSMUSG00000046157	479.707	-0.662573	0.0141933	Tmem229b
ENSMUSG00000030357	382.431	-0.660974	0.0195478	Fkbp4
ENSMUSG00000040297	81.2357	-0.657357	0.032945	Suco
ENSMUSG00000006360	654.216	-0.648974	0.00733213	Crip1
ENSMUSG00000029554	71.4063	-0.648143	0.0318609	Mad1l1
ENSMUSG00000041926	181.228	-0.647819	0.00427219	Rnpep
ENSMUSG00000048756	91.7607	-0.647708	0.0100286	Foxo3
ENSMUSG00000028843	2389.19	-0.642948	0.0366857	Sh3bgrl3
ENSMUSG00000029613	147.464	-0.642621	0.00538198	Eif2ak1
ENSMUSG00000049643	79.9228	-0.641412	0.0432615	2310022A10Rik
ENSMUSG00000028906	127.967	-0.638534	0.00470145	Epb4.1
ENSMUSG00000043931	121.629	-0.634447	0.03133	Gimap7
ENSMUSG00000024238	167.183	-0.630486	0.00562287	Zeb1
ENSMUSG00000041645	447.069	-0.626805	0.0323915	Ddx24
ENSMUSG00000024844	356.814	-0.623572	0.0397345	Banf1
ENSMUSG00000097636	119.647	-0.622872	0.0108486	5830416P10Rik
ENSMUSG00000024644	180.51	-0.617373	0.022119	Cndp2
ENSMUSG00000019866	166.984	-0.608746	0.00593632	Aim1
ENSMUSG00000028599	66.0538	-0.596574	0.0383325	Tnfrsf1b
ENSMUSG00000064363	6176.03	-0.596226	0.0108486	mt-Nd4
ENSMUSG00000007670	1730.57	-0.595724	0.00492999	Khsrp
ENSMUSG00000039157	266.459	-0.590341	0.00612117	Fam102a
ENSMUSG00000020387	395.015	-0.580683	0.0032929	Jade2
ENSMUSG00000029623	412.032	-0.577887	0.0415265	Pdap1
ENSMUSG00000049550	118.888	-0.576506	0.0349849	Clip1
ENSMUSG00000030091	275.845	-0.57205	0.00593632	Nup210
ENSMUSG00000038855	361.801	-0.572009	0.000943092	Itpkb
ENSMUSG00000001962	105.664	-0.570417	0.0206626	Fam50a
ENSMUSG00000022102	151.237	-0.567405	0.017511	Dok2
ENSMUSG00000004661	219.535	-0.565803	0.0358108	Arid3b
ENSMUSG00000004996	115.232	-0.564503	0.0206626	Mri1
ENSMUSG00000026924	119.386	-0.562723	0.0292447	Sec16a
ENSMUSG00000026469	242.867	-0.556552	0.00767517	Xpr1
ENSMUSG00000008892	172.01	-0.547096	0.0304203	Vdac3
ENSMUSG00000068290	205.707	-0.546783	0.0349849	Ddrgk1
ENSMUSG00000028931	157.921	-0.546238	0.0169574	Kcnab2
ENSMUSG00000054435	3254.64	-0.543324	0.015963	Gimap4
ENSMUSG00000003072	1017.33	-0.542081	0.0432615	Atp5d
ENSMUSG00000027634	189.946	-0.542003	0.0256149	Ndrg3
ENSMUSG00000063457	1354.43	-0.540317	0.0292447	Rps15
ENSMUSG00000067274	5268.3	-0.539366	0.0462957	Rplp0
ENSMUSG00000006057	584.682	-0.533512	0.0312169	Atp5g1
ENSMUSG00000019947	109.67	-0.532911	0.0346354	Arid5b
ENSMUSG00000031802	125.577	-0.532314	0.019996	Phxr4
ENSMUSG00000036751	424.755	-0.523304	0.00696625	Cox6b1
ENSMUSG00000024855	212.376	-0.522419	0.0464504	Pacs1
ENSMUSG00000067288	2239.49	-0.518126	0.0159225	Rps28
ENSMUSG00000049866	2181.85	-0.516246	0.0195989	Arl4c
ENSMUSG00000031933	271.022	-0.513491	0.0436546	Folr4
ENSMUSG00000029076	397.546	-0.511346	0.0401536	Sdf4
ENSMUSG00000071757	380.463	-0.507367	0.0260996	Zhx2

## Sheet: KO UP
Geneid	baseMean	log2FoldChange	padj	gene_name
ENSMUSG00002075486	127.407	2.40107	5.45e-06	NA
ENSMUSG00000080054	35.7543	1.79722	0.000412227	Rpl12-ps1
ENSMUSG00000115497	92.2229	1.67375	0.00765081	NA
ENSMUSG00000042046	75.2409	1.53044	0.00592381	Dstyk
ENSMUSG00000084111	52.8802	1.43988	0.018119	Gm15710
ENSMUSG00000000581	502.721	1.32549	0.00368549	C1d
ENSMUSG00000106895	50.8094	1.27877	0.0206626	NA
ENSMUSG00000007041	190.672	1.26064	0.0206626	Clic1
ENSMUSG00000105814	690.801	1.19536	0.000270831	NA
ENSMUSG00000103591	625.734	1.1782	0.025262	RP24-398O5.2
ENSMUSG00000060227	49.9923	1.17685	0.0349849	Casc4
ENSMUSG00000069862	235.704	1.17131	0.000412227	Rps12-ps9
ENSMUSG00000022992	42.7702	1.15701	0.0151447	Kansl2
ENSMUSG00000023873	24.917	1.14554	0.0383325	1700010I14Rik
ENSMUSG00000030096	549.221	1.13091	0.0108486	Slc6a6
ENSMUSG00000106037	73.2637	1.12493	0.0371752	NA
ENSMUSG00000081087	30.5275	1.11117	0.00470145	Rps15a-ps7
ENSMUSG00000020680	540.906	1.10496	0.0220462	Taf15
ENSMUSG00000094344	37.7609	1.09593	0.00924287	Gm11942
ENSMUSG00000064262	1148.1	1.0785	0.000343717	Gimap8
ENSMUSG00000028656	464.418	1.04007	3.05e-05	Cap1
ENSMUSG00000110275	2138.72	1.03752	0.00817303	NA
ENSMUSG00000061242	93.9578	1.02462	0.0478908	Gm9104
ENSMUSG00000060019	117.349	1.01789	0.000343717	Gm10073
ENSMUSG00000034868	334.644	1.01333	0.0176045	Myl12b
ENSMUSG00000060730	775.539	1.00943	0.0036212	Gm10086
ENSMUSG00000068262	295.029	0.999424	0.00010533	Gm5879
ENSMUSG00000005362	372.43	0.992272	0.0108915	Crbn
ENSMUSG00000113198	207.392	0.979504	0.0389842	NA
ENSMUSG00000078921	797.114	0.979088	0.00538198	Tgtp2
ENSMUSG00000062083	60.9649	0.977902	0.0359166	Rpl13a-ps1
ENSMUSG00000030029	40.4368	0.974192	0.0383325	Lrig1
ENSMUSG00000024896	543.399	0.968668	0.0408754	Minpp1
ENSMUSG00000036707	396.798	0.968594	0.00290395	Cab39
ENSMUSG00000037070	337.366	0.960925	0.00537514	Rbmxl1
ENSMUSG00000020224	120.391	0.955664	0.00857495	Llph
ENSMUSG00000033161	810.043	0.95562	0.0359166	Atp1a1
ENSMUSG00000037058	836.223	0.950984	0.0043494	Paip2
ENSMUSG00000049751	109.945	0.9472	0.00803173	Rpl36al
ENSMUSG00000027339	566.465	0.936182	0.0124292	Rassf2
ENSMUSG00000032624	1063.07	0.920835	0.0337668	Eml4
ENSMUSG00000047153	240.688	0.917451	0.0336774	Khnyn
ENSMUSG00000048720	26.3522	0.912512	0.0287572	Tbc1d12
ENSMUSG00000021133	241.439	0.907222	0.00470145	4933426M11Rik
ENSMUSG00000022820	330.453	0.897964	0.00470145	Ndufb4
ENSMUSG00000030019	180.028	0.89759	0.00556239	Fbxl14
ENSMUSG00000078087	44.263	0.879655	0.0419892	Rps12l1
ENSMUSG00000021215	96.0065	0.877808	0.00244046	Net1
ENSMUSG00000029621	932.768	0.87227	0.0414737	Arpc1a
ENSMUSG00000015478	196.316	0.871852	0.00182179	Rnf5
ENSMUSG00000027508	187.442	0.854936	0.0383325	Pag1
ENSMUSG00000028271	168.512	0.854165	0.0336774	Gtf2b
ENSMUSG00000070407	57.737	0.853557	0.0206626	Hs3st3b1
ENSMUSG00000069682	1111.82	0.845269	0.000418239	Gm10275
ENSMUSG00000100865	205.54	0.839224	0.00538198	RP23-85E24.2
ENSMUSG00000018765	59.8086	0.834628	0.00592381	Fxr2
ENSMUSG00000049076	138.802	0.833157	0.0176045	Acap2
ENSMUSG00000066175	35.5262	0.833149	0.0368189	2510046G10Rik
ENSMUSG00000051998	498.216	0.815896	0.00562287	Lax1
ENSMUSG00000054079	312.407	0.812761	0.00470145	Utp18
ENSMUSG00000035150	739.465	0.808909	0.0302768	Eif2s3x
ENSMUSG00000082895	109.606	0.803585	0.00308772	Rpsa-ps9
ENSMUSG00000052146	179.246	0.803036	0.0302768	Rps10
ENSMUSG00000110057	282.096	0.794726	0.03133	NA
ENSMUSG00000084349	292.983	0.781781	0.000133479	Rpl3-ps1
ENSMUSG00000046546	158.712	0.779811	0.000378642	Fam43a
ENSMUSG00000047139	577.534	0.770756	0.000378642	Cd24a
ENSMUSG00000037972	424.996	0.770205	0.00612117	Snn
ENSMUSG00000018189	129.605	0.767467	0.0371752	Uchl5
ENSMUSG00000059325	119.157	0.765744	0.00492999	Hopx
ENSMUSG00000024926	54.6521	0.764603	0.0323915	Kat5
ENSMUSG00000096942	249.685	0.764205	0.00556239	Rps19-ps6
ENSMUSG00000040811	29.6129	0.763658	0.0432615	Eml2
ENSMUSG00000024687	244.663	0.763107	0.0278486	Osbp
ENSMUSG00000003062	185.219	0.756293	0.025262	Stard3nl
ENSMUSG00000040396	200.696	0.755213	0.0355999	Abhd13
ENSMUSG00000001674	337.604	0.754378	0.00538198	Ddx18
ENSMUSG00000028646	186.089	0.753376	0.00470145	Rragc
ENSMUSG00000024098	63.0968	0.75155	0.0151447	Twsg1
ENSMUSG00000121091	67.5839	0.751396	0.0327363	NA
ENSMUSG00000028688	90.585	0.750546	0.0136423	Toe1
ENSMUSG00000040250	97.8419	0.749735	0.0158237	Asun
ENSMUSG00000042699	385.177	0.74762	0.000412227	Dhx9
ENSMUSG00000026457	863.031	0.745819	0.00803173	Adipor1
ENSMUSG00000022124	156.482	0.737665	0.0173578	Fbxl3
ENSMUSG00000078922	572.693	0.733577	0.00722224	Tgtp1
ENSMUSG00000015671	1010.38	0.732526	0.0278065	Psma2
ENSMUSG00000024150	70.3277	0.730589	0.0168606	Mcfd2
ENSMUSG00000009030	67.5819	0.725305	0.0206626	Pdcl
ENSMUSG00000024948	1050.19	0.723762	0.0141933	Map4k2
ENSMUSG00000021067	142.797	0.723579	0.0330659	Sav1
ENSMUSG00000005069	120.203	0.707085	0.0204334	Pex5
ENSMUSG00000007850	980.61	0.704009	0.00259223	Hnrnph1
ENSMUSG00000031590	357.028	0.698583	0.0458729	Frg1
ENSMUSG00000040325	214.881	0.696685	0.0206626	Vprbp
ENSMUSG00000019897	247.301	0.696504	0.03133	Ccdc59
ENSMUSG00000006412	383.459	0.695335	0.0399459	Pfdn2
ENSMUSG00000019189	124.985	0.692953	0.0302768	Rnf145
ENSMUSG00000109865	134.861	0.690794	0.0349849	NA
ENSMUSG00000038291	44.3078	0.690414	0.0408754	Snx25
ENSMUSG00000020018	316.722	0.681337	0.039551	Snrpf
ENSMUSG00000047084	175.003	0.680611	0.049521	Ngrn
ENSMUSG00000022663	199.564	0.680054	0.0150641	Atg3
ENSMUSG00000053012	268	0.67447	0.00768132	Krcc1
ENSMUSG00000019370	715.868	0.670253	0.0397345	Calm3
ENSMUSG00000004018	76.3271	0.662171	0.0319736	Fancl
ENSMUSG00000030751	467.65	0.660486	0.00765081	Psma1
ENSMUSG00000031403	461.653	0.654165	0.0206626	Dkc1
ENSMUSG00000054293	64.8176	0.652789	0.0206626	A630033H20Rik
ENSMUSG00000033953	232.942	0.651915	0.0206626	Ppp3r1
ENSMUSG00000014504	156.953	0.647007	0.0333623	Srp19
ENSMUSG00000078193	787.922	0.642013	0.0142022	Gm2000
ENSMUSG00000025337	134.848	0.640495	0.0361435	Sbds
ENSMUSG00000090946	64.4366	0.640009	0.041412	Ccdc71l
ENSMUSG00000028577	314.056	0.636139	0.00308772	Plaa
ENSMUSG00000112099	670.719	0.633264	0.0084851	NA
ENSMUSG00000115358	632.051	0.626762	0.0169574	NA
ENSMUSG00000078622	120.635	0.622039	0.023948	Ccdc47
ENSMUSG00000070697	178.996	0.621116	0.0158648	Utp3
ENSMUSG00000073538	137.406	0.61519	0.0192749	E330020D12Rik
ENSMUSG00000042082	65.1377	0.610327	0.0393184	Arsb
ENSMUSG00000037400	636.017	0.607931	0.000133479	Atp11b
ENSMUSG00000006169	415.647	0.605995	0.0368189	Clint1
ENSMUSG00000036873	87.0714	0.599161	0.0475776	2410004B18Rik
ENSMUSG00000032698	442.58	0.598754	0.0143844	Lmo2
ENSMUSG00000100755	1342.72	0.596673	0.0286118	Rps23-ps
ENSMUSG00000036693	128.641	0.59398	0.025262	Nop14
ENSMUSG00000036568	132.712	0.590929	0.0278065	Gltscr1l
ENSMUSG00000037197	159.437	0.586613	0.043544	Rbm17
ENSMUSG00000038546	282.533	0.584387	0.0280693	Ranbp9
ENSMUSG00000036822	136.499	0.581355	0.0032929	Topors
ENSMUSG00000056708	642.627	0.578072	0.00556239	Ier5
ENSMUSG00000022744	97.3843	0.57627	0.0343854	Cldn25
ENSMUSG00000016206	706.237	0.575378	0.0169574	H2-M3
ENSMUSG00000018583	1254.62	0.575064	0.00562287	G3bp1
ENSMUSG00000039456	309.824	0.574359	0.0336774	Morc3
ENSMUSG00000038175	714.213	0.573051	0.00470145	Mylip
ENSMUSG00000052033	89.7656	0.570437	0.0371752	Pfdn4
ENSMUSG00000025505	103.242	0.568358	0.0174955	Tmem80
ENSMUSG00000027523	4045.32	0.565359	0.0206626	Gnas
ENSMUSG00000035900	304.25	0.565171	0.0206626	Gramd4
ENSMUSG00000090272	1791.36	0.561179	0.0198536	Mndal
ENSMUSG00000019814	155.209	0.551504	0.025262	Ltv1
ENSMUSG00000021537	178.21	0.550315	0.00733213	Cetn3
ENSMUSG00000023150	494.478	0.55029	0.00492999	Ivns1abp
ENSMUSG00000033184	384.839	0.549264	0.00857495	Tmed7
ENSMUSG00000004096	367.069	0.54632	0.00768132	Cwc15
ENSMUSG00000029229	229.098	0.542513	0.00707183	Chic2
ENSMUSG00000026155	278.684	0.541966	0.0336774	Smap1
ENSMUSG00000024764	133.763	0.54195	0.0302768	Naa40
ENSMUSG00000049086	216.545	0.541398	0.0206626	Bmyc
ENSMUSG00000029234	173.732	0.541023	0.0142022	Tmem165
ENSMUSG00000030647	228.067	0.524808	0.0337668	Ndufc2
ENSMUSG00000020454	296.544	0.518481	0.0204334	Eif4enif1
ENSMUSG00000040771	579.727	0.516209	0.0219338	Oard1
ENSMUSG00000024287	207.399	0.511109	0.00810118	Thoc1
ENSMUSG00000007836	736.358	0.50942	0.0478675	Hnrnpa0
