# Supplementary material for: Conditional T and NK cell antagonism by a giant and highly conserved orthopoxvirus virulence factor
Source: Research Square preprint supplement (doi:10.21203/rs.3.rs-8672980/v1), 2026-02-04
Supplement: Supplementary file 3 [file a38c625d4456f0947b1a2853.xlsx]

## Sheet: D7 WT UP
Geneid	baseMean	log2FoldChange	padj	gene_name
ENSMUSG00000026630	80.2351	-3.25341	2.03e-12	Batf3
ENSMUSG00000035954	25.0081	-2.91058	0.0017044	Dock4
ENSMUSG00000118620	199.959	-2.77904	0.00423525	NA
ENSMUSG00000106202	31.4113	-2.73763	0.0115392	NA
ENSMUSG00000048332	31.7522	-2.72345	0.00316849	Lhfp
ENSMUSG00000054580	58.4041	-2.63662	0.00617653	Pla2r1
ENSMUSG00000113255	83.2409	-2.55518	0.00580102	NA
ENSMUSG00000096940	184.565	-2.54825	0.0063607	Gm4755
ENSMUSG00000045231	33.8181	-2.48725	0.00395584	BC106179
ENSMUSG00000100005	91.1437	-2.44941	0.0224861	B130024G19Rik
ENSMUSG00000029913	21.0422	-2.44445	0.00722724	Prdm5
ENSMUSG00000029659	70.5692	-2.43985	0.0042068	Medag
ENSMUSG00000004110	35.475	-2.43392	0.0169495	Cacna1e
ENSMUSG00000021779	84.9423	-2.43107	0.0049047	Thrb
ENSMUSG00000028217	24.867	-2.41193	0.00492064	Cdh17
ENSMUSG00000002057	187.069	-2.40362	0.00638323	Foxn1
ENSMUSG00000074465	239.049	-2.38081	0.00393204	Gm10701
ENSMUSG00000046109	201.424	-2.36863	0.00344003	AB041806
ENSMUSG00000032368	248.132	-2.35272	0.00947897	Zic1
ENSMUSG00000038879	58.3195	-2.3521	0.00657175	Nipal2
ENSMUSG00000046337	153.825	-2.352	0.0324761	Fam178b
ENSMUSG00000115277	719.612	-2.34377	0.0114662	NA
ENSMUSG00000104385	158.003	-2.3269	0.00625012	RP23-299N6.1
ENSMUSG00000092162	41.4703	-2.3252	0.0024869	Vmn2r86
ENSMUSG00000029821	26.6614	-2.31277	0.00720229	Dfna5
ENSMUSG00000041323	22.5806	-2.30407	0.021149	Ak7
ENSMUSG00000042331	69.3811	-2.30144	0.00492064	Specc1
ENSMUSG00000045394	23.5654	-2.29144	0.0318047	Epcam
ENSMUSG00000083584	62.1079	-2.27174	0.0250526	Gm15394
ENSMUSG00000042215	29.2519	-2.26998	0.00539834	Bag2
ENSMUSG00000084775	37.4262	-2.26933	0.00492064	Gm16741
ENSMUSG00000056055	195.91	-2.25417	0.00722724	Sag
ENSMUSG00000044707	97.8666	-2.25046	0.0156597	Ccnjl
ENSMUSG00000086903	21.414	-2.24203	0.007884	Hotair
ENSMUSG00000022861	30.152	-2.23351	0.0264585	Dgkg
ENSMUSG00000091924	40.993	-2.23096	0.025532	Vmn1r185
ENSMUSG00000084375	80.1775	-2.22787	0.0219521	Gm11637
ENSMUSG00000104634	27.9614	-2.22532	0.0482283	NA
ENSMUSG00000085021	233.381	-2.22506	0.0101524	Gm12051
ENSMUSG00000104187	42.6764	-2.20674	0.028392	RP24-271M20.2
ENSMUSG00000089785	47.6065	-2.20117	0.0445838	Slc25a5-ps
ENSMUSG00000011171	59.014	-2.18827	0.00764658	Vipr2
ENSMUSG00000047369	36.4155	-2.18385	0.00878526	Dnah14
ENSMUSG00000111039	28.4338	-2.17317	0.011372	NA
ENSMUSG00000025195	69.4546	-2.16644	0.00800961	Dnmbp
ENSMUSG00000085202	303.044	-2.15029	0.00886235	Gm15620
ENSMUSG00000020793	65.3445	-2.14416	0.00722724	Galr2
ENSMUSG00000034212	121.31	-2.13628	0.00930869	Ankmy1
ENSMUSG00000108238	57.6278	-2.13261	0.0114662	NA
ENSMUSG00000022346	99.6716	-2.12749	0.0219521	Myc
ENSMUSG00000049119	350.582	-2.10313	0.00629083	Fam110b
ENSMUSG00000061143	52.7851	-2.08826	0.00396892	Maml3
ENSMUSG00000037610	62.9932	-2.07461	0.0185618	Kcnmb2
ENSMUSG00000101144	37.6389	-2.07278	0.0460143	Gm29054
ENSMUSG00000009566	143.892	-2.0714	0.0146457	Fpgs
ENSMUSG00000104865	749.12	-2.05707	0.00828443	NA
ENSMUSG00000087104	854.912	-2.0511	0.00405885	Tmem132cos
ENSMUSG00000045055	187.016	-2.04416	0.0315309	Rpsa-ps2
ENSMUSG00000092418	120.611	-2.0155	0.00998295	Gm20406
ENSMUSG00000070815	24.7519	-2.01124	0.0196076	Vmn1r87
ENSMUSG00000110080	22.0198	-2.00854	0.0404616	NA
ENSMUSG00000111283	59.559	-2.00718	0.0343737	NA
ENSMUSG00000030069	56.4397	-1.99824	0.0160193	Prok2
ENSMUSG00000085241	388.116	-1.98664	0.0079641	Snhg3
ENSMUSG00000008305	26.7307	-1.9743	0.0487442	Tle1
ENSMUSG00000100455	27.8262	-1.97426	0.0173171	Gm29170
ENSMUSG00000097119	639.66	-1.95185	0.00935178	B230354K17Rik
ENSMUSG00000017204	27.0994	-1.94206	0.0295737	Gsdma
ENSMUSG00000087368	89.8017	-1.94085	0.0110278	BC065397
ENSMUSG00000077317	198.796	-1.93836	0.00645876	Gm25785
ENSMUSG00000019787	99.3239	-1.9377	0.0156822	Trdn
ENSMUSG00000039103	114.798	-1.93454	0.0192647	Nexn
ENSMUSG00000035678	23.7571	-1.93287	0.0253978	Tnfsf9
ENSMUSG00000114826	151.369	-1.93157	0.00121746	NA
ENSMUSG00000050558	21.5786	-1.92914	0.040055	Prokr2
ENSMUSG00000112947	20.572	-1.92513	0.0358462	NA
ENSMUSG00000107160	59.9231	-1.91831	0.000135364	NA
ENSMUSG00000044337	130.854	-1.91284	0.0134149	Ackr3
ENSMUSG00000031762	1509.15	-1.91118	0.000248668	Mt2
ENSMUSG00000111758	209.589	-1.90787	0.0118534	NA
ENSMUSG00000082088	42.3588	-1.90422	0.00625012	Gm15753
ENSMUSG00000026770	241.523	-1.90159	0.000478434	Il2ra
ENSMUSG00000047631	44.0498	-1.8956	0.0393762	Apof
ENSMUSG00000029379	68.2259	-1.89169	0.0120022	Cxcl3
ENSMUSG00000026249	147.365	-1.8871	0.0170764	Serpine2
ENSMUSG00000025586	66.9462	-1.88653	0.0171666	Cpeb1
ENSMUSG00000105459	24.3674	-1.88386	0.0333195	NA
ENSMUSG00000105374	24.5301	-1.85722	0.022688	NA
ENSMUSG00000010803	25.1386	-1.8459	0.00350736	Gabra1
ENSMUSG00000028602	49.0761	-1.84587	0.000896669	Tnfrsf8
ENSMUSG00000117515	263.795	-1.83159	0.00661981	NA
ENSMUSG00000029207	52.7221	-1.8289	0.0144404	Apbb2
ENSMUSG00000031765	1356.15	-1.81967	0.000153347	Mt1
ENSMUSG00000096544	57.2956	-1.81068	0.00039705	Gm4617
ENSMUSG00000086389	100.745	-1.80307	0.0411351	Gm15998
ENSMUSG00000053553	147.076	-1.80074	5.31e-05	3110082I17Rik
ENSMUSG00000111064	59.7952	-1.80025	0.00311519	NA
ENSMUSG00000052512	74.939	-1.77739	0.0241145	Nav2
ENSMUSG00000014599	54.0398	-1.77661	0.00750314	Csf1
ENSMUSG00000087386	67.738	-1.77257	0.0124034	Gm15637
ENSMUSG00000052372	158.899	-1.7637	0.00728202	Il1rapl1
ENSMUSG00000044033	247.75	-1.76317	0.000987481	Ccdc141
ENSMUSG00000021007	64.8997	-1.75731	0.0390559	Spata7
ENSMUSG00000111457	23.3703	-1.75717	0.0351288	NA
ENSMUSG00000020389	187.497	-1.75017	0.0135152	Cdkl3
ENSMUSG00000086555	43.4888	-1.74777	0.0251558	Gm13446
ENSMUSG00000103845	81.6337	-1.7473	0.0232063	RP23-76C20.4
ENSMUSG00000057440	585.951	-1.72075	0.0148735	Mpp7
ENSMUSG00000033720	25.7037	-1.71933	0.0224861	Sfxn5
ENSMUSG00000041992	65.9251	-1.71688	0.0238139	Rapgef5
ENSMUSG00000115589	23.3854	-1.71616	0.0170764	NA
ENSMUSG00000038872	24.0948	-1.71542	0.0155666	Zfhx3
ENSMUSG00000033768	21.346	-1.71236	0.0140977	Nrxn2
ENSMUSG00000042622	229.568	-1.7113	0.00935023	Maff
ENSMUSG00000114267	23.6995	-1.70823	0.0479805	NA
ENSMUSG00000107092	284.334	-1.70778	0.0047783	NA
ENSMUSG00000073591	32.7393	-1.70017	0.0401135	Pcdhb22
ENSMUSG00000046768	31.6094	-1.69845	0.0424299	Rhoj
ENSMUSG00000078249	22.7781	-1.69472	0.0224171	Hmga1-rs1
ENSMUSG00000063816	55.4134	-1.69445	0.0206417	Gm4987
ENSMUSG00000034951	146.389	-1.69334	0.00525975	Cog7
ENSMUSG00000030983	190.718	-1.69031	0.00335869	Bccip
ENSMUSG00000103089	129.56	-1.6865	0.00385352	RP23-59N15.2
ENSMUSG00000021838	75.6453	-1.6858	0.00968362	Samd4
ENSMUSG00000015568	91.6981	-1.68452	0.00297316	Lpl
ENSMUSG00000037643	176.744	-1.68129	0.0225456	Prkci
ENSMUSG00000021792	70.8847	-1.67786	5.44e-05	Fam213a
ENSMUSG00000024891	23.6138	-1.67638	0.00750314	Slc29a2
ENSMUSG00000027709	74.4704	-1.66679	0.0259154	Mccc1
ENSMUSG00000116478	53.1968	-1.6634	0.00350736	NA
ENSMUSG00000081452	48.1683	-1.66118	0.0110335	Gm14761
ENSMUSG00000039929	46.7394	-1.65649	0.0219521	Urb1
ENSMUSG00000024732	866.095	-1.64985	0.0171209	Ccdc86
ENSMUSG00000121201	23.6764	-1.64411	0.00959043	NA
ENSMUSG00000021991	27.8041	-1.63984	0.0155486	Cacna2d3
ENSMUSG00000023092	30.7087	-1.63825	0.0302759	Fhl1
ENSMUSG00000108952	122.673	-1.63443	0.00998295	NA
ENSMUSG00000020542	21.3795	-1.62736	0.0209933	Myocd
ENSMUSG00000036192	61.7738	-1.62488	0.0146462	Rorb
ENSMUSG00000064371	82.5646	-1.62365	8.37e-05	mt-Tt
ENSMUSG00000060227	102.363	-1.61818	0.0259168	Casc4
ENSMUSG00000026812	145.59	-1.60827	0.00466617	Tsc1
ENSMUSG00000000560	26.273	-1.60815	0.0485133	Gabra2
ENSMUSG00000031562	97.6248	-1.6054	0.0172594	Dctd
ENSMUSG00000021009	102.687	-1.59692	0.0253791	Ptpn21
ENSMUSG00000083705	22.4907	-1.5935	0.00756051	Gm8624
ENSMUSG00000020224	245.434	-1.57761	0.00039705	Llph
ENSMUSG00000102840	51.6562	-1.57402	0.0291465	RP23-355E19.1
ENSMUSG00000022094	40.9403	-1.57286	0.025345	Slc39a14
ENSMUSG00000009551	40.1281	-1.57083	0.0356006	6330409D20Rik
ENSMUSG00000018736	673.999	-1.57082	0.00625012	Ndel1
ENSMUSG00000025050	199.628	-1.56	0.00492064	Pcgf6
ENSMUSG00000038214	20.4212	-1.55825	0.0472095	Bend3
ENSMUSG00000072589	41.1286	-1.55744	0.0298102	Gm10371
ENSMUSG00000083953	49.2691	-1.55331	0.0385732	Gm14049
ENSMUSG00000026622	238.272	-1.54299	0.00297316	Nek2
ENSMUSG00000029752	125.889	-1.54109	0.00049546	Asns
ENSMUSG00000029249	402.813	-1.52988	0.00177496	Rest
ENSMUSG00000051721	78.8594	-1.51819	0.00992384	BC068281
ENSMUSG00000032892	37.4093	-1.51596	0.0144323	Rangrf
ENSMUSG00000026694	261.666	-1.51366	0.00800961	Mettl13
ENSMUSG00000026749	52.6837	-1.5095	0.00111928	Nek6
ENSMUSG00000053702	23.8345	-1.50125	0.0397369	Nebl
ENSMUSG00000121035	306.626	-1.49858	0.000900344	NA
ENSMUSG00000028710	76.2446	-1.48328	0.00794496	Atpaf1
ENSMUSG00000048039	168.427	-1.47659	0.0479325	Isg20l2
ENSMUSG00000038143	36.7766	-1.47123	0.0446789	Stox2
ENSMUSG00000097431	285.43	-1.46645	0.0079641	Gm26782
ENSMUSG00000031760	425.506	-1.45219	0.000218701	Mt3
ENSMUSG00000027210	26.0771	-1.44606	0.0399059	Meis2
ENSMUSG00000101514	44.2241	-1.42538	0.0369668	Gm5524
ENSMUSG00000003360	293.132	-1.42292	0.0222629	Ddx23
ENSMUSG00000069601	33.0896	-1.42229	0.00308967	Ank3
ENSMUSG00000037197	540.285	-1.41956	4.08e-05	Rbm17
ENSMUSG00000003545	59.7677	-1.41827	0.00706485	Fosb
ENSMUSG00000024220	81.9886	-1.41437	0.0329456	Zfp523
ENSMUSG00000005718	36.0437	-1.40939	0.00237982	Tfap4
ENSMUSG00000074807	52.2309	-1.40799	0.0171666	Gm10762
ENSMUSG00000087179	22.1966	-1.40044	0.0177865	Gm14230
ENSMUSG00000117869	92.6233	-1.39517	0.00835454	NA
ENSMUSG00000057541	150.577	-1.39282	7.08e-07	Pus7
ENSMUSG00000020116	108.032	-1.38468	0.000544331	Pno1
ENSMUSG00000041995	28.9297	-1.37452	0.0077744	Zbed3
ENSMUSG00000061838	276.07	-1.37365	0.0109447	Suclg2
ENSMUSG00000001173	35.163	-1.37026	0.0132318	Ocrl
ENSMUSG00000107304	307.701	-1.36948	0.00230669	NA
ENSMUSG00000003992	65.6204	-1.36756	0.0385732	Ssbp2
ENSMUSG00000067367	795.83	-1.35268	0.000896669	Lyar
ENSMUSG00000105879	45.5163	-1.34987	0.0274439	NA
ENSMUSG00000042354	309.519	-1.34162	3.67e-07	Gnl3
ENSMUSG00000021250	63.8886	-1.32453	0.0225456	Fos
ENSMUSG00000025006	159.439	-1.31778	0.00423525	Sorbs1
ENSMUSG00000021067	39.9008	-1.3077	0.0401135	Sav1
ENSMUSG00000038379	490.699	-1.30741	0.00689885	Ttk
ENSMUSG00000014496	69.8287	-1.30688	0.000488924	Ankrd28
ENSMUSG00000034620	64.9336	-1.30639	0.00230669	Tmem5
ENSMUSG00000083899	27.7092	-1.30581	0.0343928	Gm12346
ENSMUSG00000069862	164.569	-1.30353	0.0142676	Rps12-ps9
ENSMUSG00000040524	48.8659	-1.29792	0.012712	Zfp609
ENSMUSG00000081382	29.7556	-1.29731	0.0152892	Rpl18-ps1
ENSMUSG00000026843	36.4197	-1.2926	0.0155799	Fubp3
ENSMUSG00000001305	124.219	-1.29185	2.52e-05	Rrp15
ENSMUSG00000074136	73.6406	-1.28984	0.0246244	4930513N10Rik
ENSMUSG00000078134	34.5528	-1.27489	0.0392762	Gm12355
ENSMUSG00000030604	154.254	-1.27448	0.0414338	Zfp626
ENSMUSG00000063018	27.2994	-1.26714	0.0047108	2010204K13Rik
ENSMUSG00000049751	108.262	-1.26608	0.00020183	Rpl36al
ENSMUSG00000085156	56.9926	-1.26127	0.0202273	Gm11974
ENSMUSG00000027374	329.079	-1.25597	0.0225456	Mrps5
ENSMUSG00000053469	82.1592	-1.25553	0.0196257	Tg
ENSMUSG00000024527	214.467	-1.24686	0.0178703	Afg3l2
ENSMUSG00000036580	49.2238	-1.24059	0.00154341	Spg20
ENSMUSG00000057113	3989.48	-1.23785	8.53e-07	Npm1
ENSMUSG00000032373	49.1579	-1.23688	0.0152959	Car12
ENSMUSG00000015176	683.798	-1.23307	0.000466974	Nolc1
ENSMUSG00000068134	462.847	-1.23304	0.00947897	Zfp120
ENSMUSG00000023147	42.8269	-1.23109	0.0433985	Wrb
ENSMUSG00000115685	31.786	-1.22816	0.0390348	NA
ENSMUSG00000026918	816.067	-1.22373	0.00395584	Brd3
ENSMUSG00000021643	91.9062	-1.21923	0.0406432	Serf1
ENSMUSG00000106636	105.201	-1.21661	0.00962848	NA
ENSMUSG00000027405	616.8	-1.21557	0.0282337	Nop56
ENSMUSG00000019982	209.439	-1.21495	0.0052267	Myb
ENSMUSG00000063556	25.1167	-1.20624	0.00525975	Gm10132
ENSMUSG00000073236	55.1534	-1.20567	0.0423501	2500004C02Rik
ENSMUSG00000041625	94.5679	-1.20438	0.0132928	Ggact
ENSMUSG00000058430	46.1641	-1.19923	0.0340624	Rpl27a-ps2
ENSMUSG00000040010	652.777	-1.19695	0.000355352	Slc7a5
ENSMUSG00000034667	60.677	-1.18773	0.038214	Xpot
ENSMUSG00000025086	32.818	-1.1873	0.0344075	Trub1
ENSMUSG00000046434	1139.69	-1.17689	0.00801149	Hnrnpa1
ENSMUSG00000022185	2332.31	-1.16899	0.0291465	Acin1
ENSMUSG00000057335	28.2783	-1.16804	0.0283297	Cep170
ENSMUSG00000064344	41.0427	-1.16768	0.00396892	mt-Tm
ENSMUSG00000027099	77.593	-1.16407	0.0126563	Mtx2
ENSMUSG00000000628	106.446	-1.16308	0.00328173	Hk2
ENSMUSG00000084106	85.0999	-1.16122	0.0380998	Gm6136
ENSMUSG00000043155	22.1657	-1.15522	0.0465976	Hpdl
ENSMUSG00000011256	874.366	-1.1549	0.0250543	Adam19
ENSMUSG00000039963	27.3283	-1.15299	0.0201111	Ccdc40
ENSMUSG00000001021	24.7113	-1.15292	0.0471537	S100a3
ENSMUSG00000025264	36.5619	-1.14239	0.0261114	Tsr2
ENSMUSG00000019857	168.536	-1.14226	0.0388332	Asf1a
ENSMUSG00000000568	1895.14	-1.13835	0.00347443	Hnrnpd
ENSMUSG00000055322	46.4953	-1.13697	0.0169761	Tns1
ENSMUSG00000025245	44.719	-1.13167	0.0247002	Lztfl1
ENSMUSG00000052684	70.7069	-1.13057	0.00924981	Jun
ENSMUSG00000029217	39.5078	-1.12884	0.0251558	Tec
ENSMUSG00000031530	33.3127	-1.12724	0.0169761	Dusp4
ENSMUSG00000039795	20.9128	-1.12637	0.0494844	Zfand1
ENSMUSG00000030172	64.3746	-1.115	0.00722724	Erc1
ENSMUSG00000038059	26.8328	-1.10819	0.0259824	Smim3
ENSMUSG00000015023	255.908	-1.10603	2.22e-05	Ddx19a
ENSMUSG00000031843	102.703	-1.09922	0.0251558	Mphosph6
ENSMUSG00000028706	176.622	-1.08531	0.0453891	Nsun4
ENSMUSG00000028164	87.7241	-1.08094	0.0162585	Manba
ENSMUSG00000039197	189.667	-1.08081	0.0132318	Adk
ENSMUSG00000021870	212.169	-1.06338	0.007884	Slmap
ENSMUSG00000016477	239.283	-1.05137	0.00750314	E2f3
ENSMUSG00000009630	370.894	-1.05124	0.00625012	Ppp2cb
ENSMUSG00000026238	19752.6	-1.05059	0.00525975	Ptma
ENSMUSG00000030216	567.359	-1.0461	0.0122732	Wbp11
ENSMUSG00000028953	135.735	-1.04486	0.000237228	Abcf2
ENSMUSG00000032324	62.4519	-1.04393	0.0083534	Tspan3
ENSMUSG00000078154	32.0992	-1.03938	0.0192906	Gm12184
ENSMUSG00000024190	51.3379	-1.03524	0.00154341	Dusp1
ENSMUSG00000033099	775.15	-1.0328	0.00764658	Nol12
ENSMUSG00000032290	82.6706	-1.03056	0.0042068	Ptpn9
ENSMUSG00000026078	73.8035	-1.02367	0.00905234	Pdcl3
ENSMUSG00000027285	256.548	-1.01488	0.00700539	Haus2
ENSMUSG00000086429	33.585	-1.01289	0.0386264	Gt(ROSA)26Sor
ENSMUSG00000094344	41.0281	-0.998743	0.028212	Gm11942
ENSMUSG00000022797	139.128	-0.998157	0.0187322	Tfrc
ENSMUSG00000100228	28.6927	-0.997325	0.0237052	Gm29257
ENSMUSG00000054717	7160.81	-0.99431	0.00992233	Hmgb2
ENSMUSG00000040550	309.046	-0.993494	0.0100345	Otud6b
ENSMUSG00000030410	69.9015	-0.989349	0.00944943	Dmwd
ENSMUSG00000020534	240.366	-0.986466	0.0105933	Shmt1
ENSMUSG00000031015	63.9041	-0.982745	0.0333239	Swap70
ENSMUSG00000066629	65.8049	-0.98098	0.0213548	Rpl36-ps3
ENSMUSG00000026356	369.22	-0.973376	0.00998295	Dars
ENSMUSG00000001436	182.649	-0.971163	0.0314879	Slc19a1
ENSMUSG00000032527	184.288	-0.970626	0.0472095	Pccb
ENSMUSG00000034848	28.6292	-0.962989	0.0333195	Ttc21b
ENSMUSG00000031403	1321.62	-0.955382	0.0302639	Dkc1
ENSMUSG00000066043	39.0432	-0.952704	0.0177292	Phactr4
ENSMUSG00000021958	108.853	-0.949793	0.00507925	Pinx1
ENSMUSG00000047139	103.771	-0.945005	0.0341271	Cd24a
ENSMUSG00000069682	346.458	-0.944122	2.22e-05	Gm10275
ENSMUSG00000035455	156.986	-0.943656	0.0207164	Fignl1
ENSMUSG00000048087	75.219	-0.942765	0.0328035	Gm4737
ENSMUSG00000108414	329.717	-0.935036	0.00158978	NA
ENSMUSG00000011257	1399.59	-0.934876	0.0006473	Pabpc4
ENSMUSG00000020650	115.83	-0.934576	0.00539834	Bcap29
ENSMUSG00000048997	24.3802	-0.930874	0.0441904	Atxn7l2
ENSMUSG00000035268	66.9779	-0.930024	0.0253337	Pkig
ENSMUSG00000025732	82.9089	-0.925041	0.00405885	Fam195a
ENSMUSG00000038718	80.1614	-0.924377	0.0261114	Pbx3
ENSMUSG00000080538	40.5101	-0.922026	0.0424299	Gm25541
ENSMUSG00000067344	88.5601	-0.921472	0.00261753	Rps25-ps1
ENSMUSG00000112099	329.085	-0.918465	0.0178703	NA
ENSMUSG00000024528	74.9145	-0.916586	0.00295182	Srfbp1
ENSMUSG00000033871	66.3992	-0.915297	0.0348073	Ppargc1b
ENSMUSG00000044906	88.6145	-0.912593	0.000832385	4930503L19Rik
ENSMUSG00000029169	590.867	-0.911123	0.021238	Dhx15
ENSMUSG00000041891	135.769	-0.910708	0.0042068	Lman1
ENSMUSG00000031107	182.556	-0.909194	0.030284	Rbmx2
ENSMUSG00000016257	262.375	-0.903907	0.00700187	Slmo2
ENSMUSG00000025894	94.5786	-0.902606	0.0441904	Aasdhppt
ENSMUSG00000024359	756.764	-0.896953	0.00539834	Hspa9
ENSMUSG00000032409	139.875	-0.895828	0.0425752	Atr
ENSMUSG00000027395	111.589	-0.895746	0.0174329	Polr1b
ENSMUSG00000081051	166.996	-0.893028	6.74e-05	Gm15427
ENSMUSG00000099764	352.154	-0.888694	0.0453829	Rps10-ps2
ENSMUSG00000030208	78.0387	-0.886657	0.0195961	Emp1
ENSMUSG00000021192	41.1938	-0.885237	0.0112416	Golga5
ENSMUSG00000033931	291.617	-0.880799	0.00179304	Rbm34
ENSMUSG00000040785	330.166	-0.880517	0.00600052	Ttc3
ENSMUSG00000069135	52.2824	-0.864318	0.00800961	Fgfr1op
ENSMUSG00000039630	4620.25	-0.859933	0.0149057	Hnrnpu
ENSMUSG00000063235	61.89	-0.858847	0.00623213	Ptpmt1
ENSMUSG00000027882	62.5661	-0.855992	0.0237052	Stxbp3a
ENSMUSG00000032178	206.546	-0.84571	0.00998295	Ilf3
ENSMUSG00000006732	168.379	-0.842169	0.0073264	Mettl1
ENSMUSG00000025266	186.28	-0.834698	0.0100716	Gnl3l
ENSMUSG00000034826	84.6154	-0.833033	0.0178703	Nup54
ENSMUSG00000027011	169.543	-0.832884	0.0132318	Ube2e3
ENSMUSG00000018537	74.4343	-0.831831	0.0457437	Pcgf2
ENSMUSG00000030189	976.071	-0.825299	0.00445288	Ybx3
ENSMUSG00000004565	147.367	-0.820874	0.00422169	Pnpla6
ENSMUSG00000000326	94.8181	-0.820745	0.0390348	Comt
ENSMUSG00000059040	202.429	-0.819852	0.020901	Eno1b
ENSMUSG00000028683	51.4342	-0.817161	0.0214804	Eif2b3
ENSMUSG00000120012	660.036	-0.816313	0.0109447	NA
ENSMUSG00000021569	243.282	-0.810933	0.0218805	Trip13
ENSMUSG00000030619	206.481	-0.809508	0.00466617	Eed
ENSMUSG00000027810	235.774	-0.807611	0.00678369	Eif2a
ENSMUSG00000021774	157.606	-0.805479	0.00295182	Ube2e1
ENSMUSG00000030663	669.111	-0.799238	0.0344869	1110004F10Rik
ENSMUSG00000052033	127.955	-0.798207	0.0101079	Pfdn4
ENSMUSG00000004980	3217.7	-0.790734	0.0117894	Hnrnpa2b1
ENSMUSG00000026283	196.251	-0.777764	0.0109447	Ing5
ENSMUSG00000029701	613.772	-0.773009	0.017856	Rbm28
ENSMUSG00000027288	443.519	-0.772682	0.0132318	Zfp106
ENSMUSG00000061024	178.039	-0.772396	0.0273993	Rrs1
ENSMUSG00000067194	607.793	-0.769998	0.0114276	Eif1ax
ENSMUSG00000029328	874.376	-0.768579	0.0465254	Hnrnpdl
ENSMUSG00000005846	502.632	-0.762429	0.0273141	Rsl1d1
ENSMUSG00000034424	84.8919	-0.757261	0.0268341	Gcsh
ENSMUSG00000019814	193.919	-0.746346	0.00492064	Ltv1
ENSMUSG00000040658	86.5949	-0.73991	0.0433759	Dnph1
ENSMUSG00000042699	603.147	-0.738476	3.55e-05	Dhx9
ENSMUSG00000023919	111.065	-0.728043	0.0112212	Cenpq
ENSMUSG00000086290	613.105	-0.72545	0.0433759	Snhg12
ENSMUSG00000025369	1120.12	-0.725353	0.0250526	Smarcc2
ENSMUSG00000018189	366.075	-0.722821	0.00380977	Uchl5
ENSMUSG00000033904	79.8169	-0.722012	0.0448834	Ccp110
ENSMUSG00000004929	90.2813	-0.720088	0.0377113	Thop1
ENSMUSG00000026070	348.027	-0.719034	0.0360982	Il18r1
ENSMUSG00000044221	162.63	-0.718927	0.0072153	Grsf1
ENSMUSG00000080848	592.472	-0.714403	0.0115392	Gm9385
ENSMUSG00000104649	209.918	-0.710964	0.0479337	NA
ENSMUSG00000053332	1326.19	-0.709548	2.22e-05	Gas5
ENSMUSG00000036940	219.519	-0.708255	0.0300783	Kdm1a
ENSMUSG00000020697	81.2864	-0.707092	0.0270777	Lig3
ENSMUSG00000030102	205.776	-0.704482	0.0155799	Itpr1
ENSMUSG00000038736	99.7274	-0.702096	0.0433759	Nudcd1
ENSMUSG00000007207	64.477	-0.699274	0.0274439	Stx1a
ENSMUSG00000020280	115.89	-0.698555	0.0264342	Pus10
ENSMUSG00000022466	130.405	-0.69111	0.0267498	Rpap3
ENSMUSG00000030057	691.735	-0.686957	0.0465254	Cnbp
ENSMUSG00000087107	325.41	-0.682426	0.00154341	AI662270
ENSMUSG00000022800	106.274	-0.677954	0.0493226	Fyttd1
ENSMUSG00000079139	62.5902	-0.675463	0.0261114	Gm4204
ENSMUSG00000026434	3609.79	-0.674659	0.00600052	Nucks1
ENSMUSG00000026687	254.49	-0.671034	0.0226937	Aldh9a1
ENSMUSG00000032469	101.427	-0.670794	0.0401135	Dbr1
ENSMUSG00000000740	2243.09	-0.66624	0.00405885	Rpl13
ENSMUSG00000083621	857.179	-0.665884	0.00959043	Gm14586
ENSMUSG00000025511	261.035	-0.664864	0.0160193	Tspan4
ENSMUSG00000031353	528.796	-0.661027	0.00845025	Rbbp7
ENSMUSG00000029687	1324.19	-0.660502	0.0134149	Ezh2
ENSMUSG00000005813	202.191	-0.660009	0.0411989	Metap1
ENSMUSG00000044950	111.682	-0.658589	0.0156079	Pwwp2a
ENSMUSG00000052397	1979.41	-0.655667	0.00869217	Ezr
ENSMUSG00000021929	474.515	-0.653045	0.00698031	Kpna3
ENSMUSG00000062937	195.514	-0.64789	0.0441904	Mtap
ENSMUSG00000026019	220.194	-0.643437	0.0300783	Wdr12
ENSMUSG00000054766	2825.25	-0.641364	0.00139015	Set
ENSMUSG00000038095	1015.05	-0.633921	0.00179304	Sbno1
ENSMUSG00000035215	576.845	-0.630269	0.0108222	Lsm7
ENSMUSG00000023852	217.42	-0.627167	0.0283297	Chd1
ENSMUSG00000024335	1905.47	-0.618354	0.0494352	Brd2
ENSMUSG00000021537	423.995	-0.617528	0.0261114	Cetn3
ENSMUSG00000040820	127.861	-0.609911	0.0441904	Hlcs
ENSMUSG00000034154	155.313	-0.607832	0.0313807	Ino80
ENSMUSG00000031590	839.418	-0.60462	0.0131391	Frg1
ENSMUSG00000023106	1023.9	-0.60424	0.00750314	Denr
ENSMUSG00000025980	1401.29	-0.597568	0.0241145	Hspd1
ENSMUSG00000029063	204.886	-0.591879	0.0401135	Nadk
ENSMUSG00000040667	193.441	-0.581035	0.0156079	Nup88
ENSMUSG00000032423	730.995	-0.579803	0.020901	Syncrip
ENSMUSG00000001785	206.766	-0.574975	0.0261114	Pwp1
ENSMUSG00000026615	891.751	-0.559478	0.0133695	Eprs
ENSMUSG00000032002	979.056	-0.558907	0.0102667	Dcun1d5
ENSMUSG00000028560	739.841	-0.549708	0.00350736	Usp1
ENSMUSG00000006310	504.992	-0.541314	0.0283267	Zbtb32
ENSMUSG00000014226	306.934	-0.539382	0.0144039	Cacybp
ENSMUSG00000022338	325.758	-0.504356	0.0433759	Eny2
ENSMUSG00000023027	225.652	-0.500353	0.0425752	Atf1

## Sheet: D7 KO UP
Geneid	baseMean	log2FoldChange	padj	gene_name
ENSMUSG00000031397	20.2231	3.20826	0.000329558	Tktl1
ENSMUSG00000112290	21.8284	2.56537	0.00112363	NA
ENSMUSG00000079017	2095.65	2.50907	6.77e-08	Ifi27l2a
ENSMUSG00000045087	234.117	2.48492	0.000571198	S1pr5
ENSMUSG00000052305	44.1296	2.45081	0.00466617	Hbb-bs
ENSMUSG00000052336	498.412	2.43548	0.0266533	Cx3cr1
ENSMUSG00000054206	602.516	2.26382	1.94e-06	Gzmm
ENSMUSG00000074896	106.986	2.1913	1.26e-06	Ifit3
ENSMUSG00000024610	450.369	2.14821	0.00016942	Cd74
ENSMUSG00000000732	22.783	2.11637	0.000260937	Icosl
ENSMUSG00000037235	297.836	2.09257	0.00139015	Mxd4
ENSMUSG00000035042	16400.3	2.08944	0.00139015	Ccl5
ENSMUSG00000045777	245.906	2.03258	0.0250526	Ifitm10
ENSMUSG00000030579	36.9326	1.95617	0.00525975	Tyrobp
ENSMUSG00000034459	74.6699	1.93914	0.0042068	Ifit1
ENSMUSG00000043873	31.502	1.93237	0.007884	Chil5
ENSMUSG00000029561	28.3721	1.92034	0.0130581	Oasl2
ENSMUSG00000025491	234.287	1.8988	0.0149129	Ifitm1
ENSMUSG00000031129	61.7637	1.82077	4.92e-06	Slc9a9
ENSMUSG00000078763	687.411	1.8185	1.91e-08	Slfn1
ENSMUSG00000079339	131.892	1.77022	0.00295531	Gm14446
ENSMUSG00000066677	178.684	1.76226	7.04e-07	Pydc3
ENSMUSG00000100426	53.6302	1.71191	0.000744395	Gm4208
ENSMUSG00000042284	48.0955	1.69241	0.0465254	Itga1
ENSMUSG00000040721	138.096	1.66047	0.0259154	Zfhx2
ENSMUSG00000036594	39.8852	1.65226	0.0178703	H2-Aa
ENSMUSG00000073491	164.479	1.64188	5.93e-07	Pydc4
ENSMUSG00000106734	182.771	1.62387	0.00625012	NA
ENSMUSG00000057596	59.8672	1.62038	0.0184947	Trim30d
ENSMUSG00000042675	363.655	1.58283	0.00293598	Ypel3
ENSMUSG00000025969	30.7779	1.55712	0.0042068	Nrp2
ENSMUSG00000050777	99.0049	1.55482	6.66e-05	Tmem37
ENSMUSG00000017466	35.5512	1.55362	0.00492064	Timp2
ENSMUSG00000041827	23.5901	1.55187	0.0414338	Oasl1
ENSMUSG00000073421	41.3976	1.53956	0.0250526	H2-Ab1
ENSMUSG00000027452	35.2284	1.52398	0.00286367	Acss1
ENSMUSG00000020042	55.3217	1.51408	0.00722724	Btbd11
ENSMUSG00000025498	480.789	1.48541	0.000218153	Irf7
ENSMUSG00000038507	50.8547	1.48413	0.000678745	Parp12
ENSMUSG00000120639	21.1385	1.47081	0.025021	NA
ENSMUSG00000003420	248.482	1.45618	0.0245384	Fcgrt
ENSMUSG00000097295	128.177	1.4547	0.0144323	Hmgb1-ps8
ENSMUSG00000030114	1124.41	1.4506	0.00396892	Klrg1
ENSMUSG00000029359	91.6567	1.43772	0.0494352	Tesc
ENSMUSG00000048534	134.393	1.42055	0.0215538	Amica1
ENSMUSG00000113669	28.1952	1.41669	0.0219521	NA
ENSMUSG00000036478	513.563	1.41341	0.00284802	Btg1
ENSMUSG00000035692	261.057	1.40227	0.0354425	Isg15
ENSMUSG00000049103	363.03	1.39715	0.0243965	Ccr2
ENSMUSG00000021262	893.379	1.39492	0.000153347	Evl
ENSMUSG00000049866	3301.89	1.39473	5.25e-05	Arl4c
ENSMUSG00000070501	83.3538	1.38403	0.0370284	BC094916
ENSMUSG00000064109	1147.01	1.38095	0.0140354	Hcst
ENSMUSG00000001751	49.4487	1.36971	0.0393762	Naglu
ENSMUSG00000021959	48.6733	1.3546	0.0017204	Lats2
ENSMUSG00000020732	52.6313	1.34904	0.00601757	Rab37
ENSMUSG00000073405	27.7737	1.34658	0.007884	C920025E04Rik
ENSMUSG00000032661	360.468	1.33871	0.0431374	Oas3
ENSMUSG00000048756	58.6674	1.33677	0.00492064	Foxo3
ENSMUSG00000121499	668.521	1.29819	0.0130377	NA
ENSMUSG00000017830	138.918	1.29427	0.0187322	Dhx58
ENSMUSG00000086533	124.874	1.28512	0.00753956	Mypopos
ENSMUSG00000070737	28.8856	1.28474	0.0318047	Gm12942
ENSMUSG00000084826	79.9351	1.2793	0.0043392	AI847159
ENSMUSG00000046031	31.7021	1.2765	0.0167473	Fam26f
ENSMUSG00000044770	51.4937	1.2701	0.0147726	Scml4
ENSMUSG00000103883	46.9723	1.26973	0.018307	RP23-145F9.3
ENSMUSG00000057219	426.646	1.26363	0.0248732	Armc7
ENSMUSG00000071724	66.6401	1.26323	0.00944943	Smpd5
ENSMUSG00000030107	64.6061	1.26219	0.0465254	Usp18
ENSMUSG00000032578	51.8603	1.25904	0.0292082	Cish
ENSMUSG00000018750	53.6686	1.24825	0.00449356	Zbtb4
ENSMUSG00000028073	69.243	1.24825	0.00592945	Pear1
ENSMUSG00000050212	184.217	1.24552	0.0401135	Eva1b
ENSMUSG00000057191	146.197	1.243	0.0465254	AB124611
ENSMUSG00000040296	257.045	1.23471	0.000162451	Ddx58
ENSMUSG00000028843	8321.17	1.22547	0.00132694	Sh3bgrl3
ENSMUSG00000064373	81.1147	1.20039	2.49e-05	Sepp1
ENSMUSG00000025790	638.688	1.19178	0.0131391	Slco3a1
ENSMUSG00000061482	511.582	1.18864	0.0355075	Hist1h4d
ENSMUSG00000047415	232.311	1.18629	0.0131391	Gpr68
ENSMUSG00000000386	138.159	1.18596	0.00890192	Mx1
ENSMUSG00000031933	46.6937	1.1855	0.00625012	Folr4
ENSMUSG00000079563	424.344	1.1818	1.98e-05	Pglyrp2
ENSMUSG00000026080	96.4935	1.17698	0.000727529	Chst10
ENSMUSG00000045362	25.4977	1.17215	0.026466	Tnfrsf26
ENSMUSG00000002227	199.691	1.16665	3.85e-05	Mov10
ENSMUSG00000025163	446.606	1.1577	0.0362512	Cd7
ENSMUSG00000056144	43.9894	1.15735	0.00429713	Trim34a
ENSMUSG00000120140	212.36	1.15512	0.0114662	NA
ENSMUSG00000031304	2252.96	1.15466	0.0037899	Il2rg
ENSMUSG00000048249	61.5538	1.145	0.0140354	Crebrf
ENSMUSG00000086652	89.1535	1.14354	0.0315309	Gm14029
ENSMUSG00000033416	98.053	1.143	0.0114662	Gucd1
ENSMUSG00000001123	1729.65	1.14133	5.65e-07	Lgals9
ENSMUSG00000003363	488.402	1.13875	0.00039705	Pld3
ENSMUSG00000028211	62.4038	1.13701	0.00143148	Trp53inp1
ENSMUSG00000016940	308.335	1.12771	0.0459258	Kctd2
ENSMUSG00000024074	111.381	1.12518	0.0219521	Crim1
ENSMUSG00000038058	102.118	1.12344	0.00128187	Nod1
ENSMUSG00000023132	21515.1	1.11932	0.000218701	Gzma
ENSMUSG00000044465	114.894	1.11809	0.0167473	Fam160a2
ENSMUSG00000042203	1140.09	1.11068	0.000677637	Tbc1d22b
ENSMUSG00000038387	163.045	1.10987	0.00443893	Rras
ENSMUSG00000030798	877.131	1.09114	0.022879	Cd37
ENSMUSG00000032596	238.841	1.09012	0.00492064	Uba7
ENSMUSG00000064215	520.146	1.08764	0.00662557	Ifi27
ENSMUSG00000120697	197.187	1.08731	0.000436781	NA
ENSMUSG00000022747	272.266	1.08537	0.000644273	St3gal6
ENSMUSG00000024675	70.0181	1.0842	0.000246529	Ms4a4c
ENSMUSG00000024845	591.389	1.08181	0.0479805	Tmem134
ENSMUSG00000031428	82.8279	1.08126	0.0068475	Zcchc18
ENSMUSG00000037849	198.593	1.08041	0.0337428	Gm4955
ENSMUSG00000037683	25.1151	1.07849	0.0259154	Armc3
ENSMUSG00000041849	76.5706	1.07498	0.021238	Card6
ENSMUSG00000058318	296.745	1.07187	0.0222629	Phf21a
ENSMUSG00000039997	567.844	1.06253	0.0479805	Ifi203
ENSMUSG00000029449	1117.34	1.06008	0.0132276	Rhof
ENSMUSG00000040746	323.992	1.05912	0.00105431	Rnf167
ENSMUSG00000041736	2074.25	1.05789	0.000248668	Tspo
ENSMUSG00000038623	130.936	1.05659	0.00935023	Tm6sf1
ENSMUSG00000002325	266.278	1.04684	0.00539834	Irf9
ENSMUSG00000001741	667.816	1.04544	0.0291465	Il16
ENSMUSG00000024424	121.683	1.04109	0.0006473	Ttc39c
ENSMUSG00000014470	1077.26	1.04047	0.00601757	Rnf166
ENSMUSG00000020788	959.344	1.03846	0.00039705	Atp2a3
ENSMUSG00000121503	85.1103	1.03759	0.0049047	NA
ENSMUSG00000001348	1123.43	1.03446	0.00722724	Acp5
ENSMUSG00000019066	100.181	1.02366	0.010382	Rab3d
ENSMUSG00000041126	895.109	1.01996	5.85e-06	H2afv
ENSMUSG00000035944	81.9611	1.01521	0.0189244	Ttc38
ENSMUSG00000034028	278.261	1.01222	0.0198417	Cd226
ENSMUSG00000032402	257.864	1.01174	0.00045432	Smad3
ENSMUSG00000071379	268.747	1.00543	0.0122732	Hpcal1
ENSMUSG00000005142	1830.72	1.00534	0.00828443	Man2b1
ENSMUSG00000035722	316.649	0.99835	0.02366	Abca7
ENSMUSG00000059895	1784.67	0.997096	0.0140354	Ptp4a3
ENSMUSG00000022946	123.176	0.996781	0.0006473	Dopey2
ENSMUSG00000029658	550.12	0.995295	0.0116422	Wdr95
ENSMUSG00000028228	77.1874	0.993679	0.024113	Cpne3
ENSMUSG00000029860	4361.24	0.993028	4.53e-10	Zyx
ENSMUSG00000003344	49.4196	0.981918	0.0270777	Btbd2
ENSMUSG00000030165	323.244	0.981611	0.007884	Klrd1
ENSMUSG00000027994	76.6319	0.974605	0.00328173	Ccdc109b
ENSMUSG00000022791	154.452	0.971992	0.0206417	Tnk2
ENSMUSG00000025647	6558.88	0.968861	0.0228225	Shisa5
ENSMUSG00000038352	243.993	0.968218	0.0237152	Arl5c
ENSMUSG00000022901	27.5745	0.968158	0.0452783	Cd86
ENSMUSG00000049932	825.405	0.957377	0.000645597	H2afx
ENSMUSG00000021242	1598.05	0.955818	0.0224861	Npc2
ENSMUSG00000044447	140.133	0.95229	0.00295182	Dock5
ENSMUSG00000071757	83.4138	0.951654	0.0296677	Zhx2
ENSMUSG00000030844	71.391	0.949701	0.0499851	Rgs10
ENSMUSG00000031328	5745.96	0.928067	0.000103912	Flna
ENSMUSG00000071657	659.186	0.926446	0.0315849	Bscl2
ENSMUSG00000021496	333.579	0.920601	1.13e-05	Pcbd2
ENSMUSG00000005763	1791.19	0.915253	3.84e-05	Cd247
ENSMUSG00000038179	714.97	0.91223	0.0262052	Slamf7
ENSMUSG00000033906	58.527	0.912221	0.0169761	Zdhhc15
ENSMUSG00000030956	335.935	0.90701	0.000596705	Fam53b
ENSMUSG00000022971	225.388	0.897457	0.00137451	Ifnar2
ENSMUSG00000032265	167.496	0.896239	0.0112298	Fam46a
ENSMUSG00000041959	10008.3	0.892298	0.00137451	S100a10
ENSMUSG00000050989	67.3388	0.888458	0.0216035	Sepn1
ENSMUSG00000047459	1182.58	0.887625	0.041664	Dynlrb1
ENSMUSG00000004266	1590.04	0.885366	0.00998295	Ptpn6
ENSMUSG00000022952	264.123	0.883821	0.00178872	Runx1
ENSMUSG00000026288	376.562	0.883425	0.000272038	Inpp5d
ENSMUSG00000002329	264.803	0.881657	0.018814	Mdp1
ENSMUSG00000079481	187.593	0.875619	0.00625012	Nhsl2
ENSMUSG00000119959	42.248	0.872913	0.0267117	NA
ENSMUSG00000048163	5007.81	0.872563	0.00491402	Selplg
ENSMUSG00000020589	245.069	0.871197	0.00722724	Fam49a
ENSMUSG00000030921	627.626	0.870414	0.0057678	Trim30a
ENSMUSG00000025135	1120.82	0.870072	0.0105933	Anapc11
ENSMUSG00000053044	13151.7	0.868438	0.000737139	Cd8b1
ENSMUSG00000021895	831.506	0.865378	0.000227532	Arhgef3
ENSMUSG00000023947	290.503	0.862269	0.00680312	Nfkbie
ENSMUSG00000048285	47.054	0.860125	0.0344075	Frmd6
ENSMUSG00000030149	577.214	0.850935	0.007884	Klrk1
ENSMUSG00000036944	190.499	0.850464	0.00600052	Tmem71
ENSMUSG00000039623	64.9609	0.846622	0.0253791	Ap5z1
ENSMUSG00000061615	687.831	0.844069	0.0353629	Hist1h2ab
ENSMUSG00000041607	532.891	0.837324	0.00143148	Mbp
ENSMUSG00000076441	1174.94	0.835	0.00449356	Ass1
ENSMUSG00000045287	110.303	0.833032	0.0250543	Rtn4rl1
ENSMUSG00000039942	111.99	0.829459	0.00324222	Ptger4
ENSMUSG00000024781	87.2173	0.826689	0.00659272	Lipa
ENSMUSG00000033220	10297.7	0.823385	0.0315309	Rac2
ENSMUSG00000032175	277.254	0.822997	0.00143148	Tyk2
ENSMUSG00000026117	1402	0.822837	0.0472617	Zap70
ENSMUSG00000022575	278.255	0.820907	0.0496828	Gsdmd
ENSMUSG00000079557	231.282	0.819076	0.0300783	2025-03-02
ENSMUSG00000034708	118.625	0.818433	0.0139344	Grn
ENSMUSG00000025138	1662.97	0.816425	0.00507801	Sirt7
ENSMUSG00000074170	85.8087	0.809802	0.00434777	Plekhf1
ENSMUSG00000039264	4169.87	0.808918	0.00464197	Gimap3
ENSMUSG00000034792	244.344	0.805188	0.00565615	Gna15
ENSMUSG00000025085	2185.24	0.802978	0.0479805	Ablim1
ENSMUSG00000028470	69.4947	0.798186	0.0251558	Hint2
ENSMUSG00000045107	109.578	0.79692	0.00835454	Saysd1
ENSMUSG00000034863	133.904	0.795909	0.0261114	Ano8
ENSMUSG00000040033	126.248	0.795824	0.0182741	Stat2
ENSMUSG00000120166	76.9722	0.794267	0.0224861	NA
ENSMUSG00000062944	60.55	0.793787	0.0336698	9130023H24Rik
ENSMUSG00000026786	1130.49	0.780799	0.000550758	Apbb1ip
ENSMUSG00000037752	64.1175	0.778761	0.0333239	Xkr8
ENSMUSG00000022584	20267.7	0.777787	0.0137944	Ly6c2
ENSMUSG00000033880	1412.43	0.776049	6.74e-05	Lgals3bp
ENSMUSG00000044475	196.32	0.77222	0.0109447	Ascc1
ENSMUSG00000091144	489.627	0.770232	0.00834038	Phf11c
ENSMUSG00000022090	209.3	0.769105	0.0135326	Pdlim2
ENSMUSG00000031812	353.917	0.768974	0.0487864	Map1lc3b
ENSMUSG00000021900	171.363	0.763816	0.0261114	Btd
ENSMUSG00000000282	169.941	0.762806	0.00750314	Mnt
ENSMUSG00000115987	968.954	0.762692	0.00039705	NA
ENSMUSG00000026879	68.6677	0.761233	0.0206417	Gsn
ENSMUSG00000028152	121.146	0.758176	0.0493212	Tspan5
ENSMUSG00000041765	591.727	0.757076	2.22e-05	Ubac2
ENSMUSG00000006127	111.184	0.755028	0.01544	Inpp5k
ENSMUSG00000033767	158.127	0.753173	0.0049047	D930015E06Rik
ENSMUSG00000037321	1784.83	0.752843	0.0471537	Tap1
ENSMUSG00000042404	95.0299	0.752456	0.025345	Dennd4b
ENSMUSG00000060675	1090.04	0.751365	0.028212	Pla2g16
ENSMUSG00000002668	780.725	0.748271	0.00750314	Dennd1c
ENSMUSG00000028070	183.625	0.747614	0.0354513	Apoa1bp
ENSMUSG00000039157	155.683	0.746552	0.0186831	Fam102a
ENSMUSG00000025188	141.055	0.746447	0.0187322	Hps1
ENSMUSG00000020737	2105.37	0.74386	0.0133869	Hn1
ENSMUSG00000001248	487.168	0.739011	0.0169364	Gramd1a
ENSMUSG00000032089	497.991	0.730757	0.0219521	Il10ra
ENSMUSG00000046862	91.545	0.730613	0.00592945	Pramef8
ENSMUSG00000028671	197.877	0.727836	0.00154341	Gale
ENSMUSG00000051007	284.037	0.726338	0.0270777	Pddc1
ENSMUSG00000027634	177.355	0.726332	0.0114985	Ndrg3
ENSMUSG00000034108	206.529	0.724748	0.0391995	Ccs
ENSMUSG00000049858	83.2985	0.723066	0.0443561	Suox
ENSMUSG00000032316	295.921	0.721947	0.00661981	Clk3
ENSMUSG00000032657	426.219	0.721806	0.00750314	Fam189b
ENSMUSG00000079227	469.806	0.718462	0.017992	Ccr5
ENSMUSG00000002307	319.878	0.718394	0.0158612	Daxx
ENSMUSG00000024387	7166.51	0.717904	0.0101379	Csnk2b
ENSMUSG00000001418	429.974	0.714955	0.0365573	Glmp
ENSMUSG00000018774	165.103	0.714186	0.0183838	Cd68
ENSMUSG00000030681	310.291	0.712611	0.0458503	Mvp
ENSMUSG00000074151	677.201	0.70938	0.0318047	Nlrc5
ENSMUSG00000036644	179.41	0.70595	0.0478802	Tbc1d9b
ENSMUSG00000049313	366.922	0.704693	0.0485133	Sorl1
ENSMUSG00000030682	720.764	0.703588	0.0434193	Cdipt
ENSMUSG00000031059	1457.42	0.702112	0.0185463	Ndufb11
ENSMUSG00000027347	374.613	0.701287	0.0291465	Rasgrp1
ENSMUSG00000039936	770.398	0.700188	0.0042068	Pik3cd
ENSMUSG00000039697	189.359	0.697952	0.0498832	Ncoa7
ENSMUSG00000002803	141.947	0.696394	0.0380998	Btbd6
ENSMUSG00000061479	1153.01	0.695151	0.0079641	Snrpa
ENSMUSG00000029030	830.104	0.694694	0.0079641	Tprgl
ENSMUSG00000090330	108.533	0.69344	0.00800961	9130221H12Rik
ENSMUSG00000060519	98.4795	0.689737	0.0292082	Tor3a
ENSMUSG00000070034	1888.67	0.689591	0.0109012	Sp110
ENSMUSG00000030750	304.466	0.688057	0.0250526	Nsmce1
ENSMUSG00000000738	402.583	0.687521	0.000126434	Spg7
ENSMUSG00000032353	345.962	0.687336	0.0481661	Tmed3
ENSMUSG00000034908	637.077	0.685083	0.00467216	Sidt2
ENSMUSG00000022779	216.24	0.680139	0.0406432	Top3b
ENSMUSG00000025503	2673.95	0.677746	0.000544331	Taldo1
ENSMUSG00000027244	233.228	0.676197	0.00179304	Atg13
ENSMUSG00000041571	2142.14	0.673399	0.0364587	Sepw1
ENSMUSG00000035725	191.926	0.668644	0.0344603	Prkx
ENSMUSG00000069094	232.782	0.666776	0.0140354	Pde7a
ENSMUSG00000050379	1162.55	0.665626	0.00659915	2025-09-06
ENSMUSG00000048120	145.435	0.665604	0.0186804	Entpd1
ENSMUSG00000034255	237.656	0.664765	0.0066401	Arhgap27
ENSMUSG00000030091	1039.34	0.664268	0.0219521	Nup210
ENSMUSG00000020827	867.149	0.663167	0.0169185	Mink1
ENSMUSG00000001403	1187.66	0.660988	0.024636	Ube2c
ENSMUSG00000021127	149.302	0.659209	0.0148735	Zfp36l1
ENSMUSG00000044703	508.423	0.658453	0.0433759	Phf11a
ENSMUSG00000079477	3544.42	0.654465	0.0187398	Rab7
ENSMUSG00000043059	123.999	0.654069	0.0408819	Zfp513
ENSMUSG00000031029	3996.56	0.652995	0.000248668	Eif3f
ENSMUSG00000020876	145.177	0.652844	0.026988	Snx11
ENSMUSG00000074886	1967.61	0.650227	0.0227614	Grk6
ENSMUSG00000051735	735.477	0.649218	0.0136492	Rinl
ENSMUSG00000025508	39717.5	0.646421	0.00746365	Rplp2
ENSMUSG00000037552	232.162	0.644019	0.030233	Plekhg2
ENSMUSG00000028530	1793.93	0.637366	0.00890192	Jak1
ENSMUSG00000106918	799.935	0.631649	0.00117955	NA
ENSMUSG00000006731	3782.38	0.630603	0.0291465	B4galnt1
ENSMUSG00000043683	198.335	0.626853	0.0390348	Fem1a
ENSMUSG00000041954	251.696	0.62483	0.00625012	Tnfrsf18
ENSMUSG00000030538	783.822	0.622747	0.00105431	Cib1
ENSMUSG00000024855	357.992	0.62157	0.00367976	Pacs1
ENSMUSG00000042385	3432.47	0.620056	0.000648887	Gzmk
ENSMUSG00000057058	1465.2	0.616938	0.0203834	Skap1
ENSMUSG00000034781	171.246	0.615862	0.0167473	Gna11
ENSMUSG00000020143	1126.82	0.613301	0.0154455	Dock2
ENSMUSG00000024818	285.498	0.610854	0.0401135	Slc25a45
ENSMUSG00000030890	989.2	0.610047	0.00998295	Ilk
ENSMUSG00000066036	392.712	0.609969	0.0292082	Ubr4
ENSMUSG00000044167	402.711	0.60915	0.00604531	Foxo1
ENSMUSG00000008348	3345.89	0.607767	0.0365823	Ubc
ENSMUSG00000024608	17831.7	0.607634	0.0252652	Rps14
ENSMUSG00000060261	723.344	0.605638	0.0169259	Gtf2i
ENSMUSG00000038976	562.693	0.603882	0.0256671	Ppp1r9b
ENSMUSG00000019505	4798.18	0.599132	0.0209897	Ubb
ENSMUSG00000030987	422.479	0.594471	0.0300783	Stim1
ENSMUSG00000032231	9203.75	0.593448	0.0187322	Anxa2
ENSMUSG00000060791	1102.35	0.592752	0.00539834	Gmfg
ENSMUSG00000073481	531.322	0.588063	0.0308146	2025-03-02
ENSMUSG00000028413	855.975	0.587021	0.0376156	B4galt1
ENSMUSG00000033253	117.845	0.584515	0.0261114	Szt2
ENSMUSG00000026875	413.513	0.582557	0.0366798	Traf1
ENSMUSG00000032040	434.113	0.580333	0.00698031	Dcps
ENSMUSG00000024381	2539.53	0.579782	0.0295066	Bin1
ENSMUSG00000048251	873.11	0.577496	0.0307421	Bcl11b
ENSMUSG00000050350	156.08	0.577292	0.0366798	Gpr18
ENSMUSG00000004056	658.405	0.568939	7.16e-05	Akt2
ENSMUSG00000001924	4328.25	0.567585	0.0407644	Uba1
ENSMUSG00000078619	610.622	0.559478	0.0116422	Smarcd2
ENSMUSG00000026463	353.775	0.559361	0.0425752	Atp2b4
ENSMUSG00000032479	1125.09	0.5593	0.0252652	Map4
ENSMUSG00000018209	929.482	0.558174	0.0269222	Stk4
ENSMUSG00000003380	996.856	0.555049	0.0367679	Rabac1
ENSMUSG00000031453	686.214	0.553805	0.00625012	Rasa3
ENSMUSG00000078572	415.282	0.551439	0.0441904	1810043H04Rik
ENSMUSG00000024679	99.7771	0.550908	0.0496828	Ms4a6d
ENSMUSG00000019843	887.679	0.549764	0.0116422	Fyn
ENSMUSG00000039168	1237.33	0.548232	0.00354957	Dap
ENSMUSG00000038582	265.921	0.548136	0.00682905	Pptc7
ENSMUSG00000033159	523.403	0.544942	0.032902	Cnppd1
ENSMUSG00000026094	657.426	0.54335	0.0215538	Stk17b
ENSMUSG00000026810	767.15	0.54231	0.00906041	Dpm2
ENSMUSG00000049401	801.429	0.537103	0.00377363	Ogfr
ENSMUSG00000078453	580.027	0.530827	0.0267035	Abracl
ENSMUSG00000033016	874.372	0.530767	0.0315309	Nfatc1
ENSMUSG00000033313	208.049	0.530091	0.0446789	Fbxl8
ENSMUSG00000022696	441.354	0.525925	0.00800961	Sidt1
ENSMUSG00000006333	15086.9	0.522194	0.00492064	Rps9
ENSMUSG00000030830	1449.23	0.520525	0.0390559	Itgal
ENSMUSG00000053898	1118.4	0.514459	0.00625012	Ech1
ENSMUSG00000004221	119.148	0.512643	0.0465271	Ikbkg
ENSMUSG00000032518	39355	0.510176	0.00299483	Rpsa
ENSMUSG00000042292	729.751	0.509274	0.00601757	Mkl1
ENSMUSG00000025178	170.821	0.506866	0.021238	Pi4k2a
ENSMUSG00000005312	684.698	0.506294	0.0248275	Ubqln1
ENSMUSG00000033128	740.923	0.503506	0.0268341	Gga1
ENSMUSG00000027639	1108.07	0.503068	0.0401135	Samhd1

## Sheet: D10 WT UP
Geneid	baseMean	log2FoldChange	padj	gene_name
ENSMUSG00000056054	42.6171	-7.93947	1.48664e-10	S100a8
ENSMUSG00000008843	22.5036	-4.24395	2.69638e-06	Cldn13
ENSMUSG00000001763	26.4897	-4.07758	4.13121e-08	Tspan33
ENSMUSG00000006574	39.5959	-3.85934	2.38336e-09	Slc4a1
ENSMUSG00000004655	33.4493	-3.78745	0.00173688	Aqp1
ENSMUSG00000028332	46.6052	-3.47653	8.20467e-12	Hemgn
ENSMUSG00000073940	600.211	-3.29616	3.12839e-07	Hbb-bt
ENSMUSG00000021281	29.7187	-3.29595	7.82677e-08	Tnfaip2
ENSMUSG00000069919	701.205	-3.29163	3.12839e-07	Hba-a1
ENSMUSG00000052305	1477.23	-3.18035	5.64365e-07	Hbb-bs
ENSMUSG00000021061	24.211	-3.17571	7.01243e-05	Sptb
ENSMUSG00000069917	371.951	-2.84075	5.56192e-05	Hba-a2
ENSMUSG00000023571	29.2582	-2.34746	1.62778e-05	Fam132a
ENSMUSG00000028644	20.3407	-2.30992	0.00159448	Ermap
ENSMUSG00000047139	89.2367	-1.72055	2.91441e-06	Cd24a
ENSMUSG00000102189	36.221	-1.66419	0.000610423	RP23-448H3.2
ENSMUSG00000076934	140.694	-1.62687	1.65066e-07	Iglv1
ENSMUSG00000076612	5376.06	-1.60165	4.48495e-19	Ighg2c
ENSMUSG00000017002	508.863	-1.54794	4.75457e-09	Slpi
ENSMUSG00000031762	326.172	-1.51363	0.0428638	Mt2
ENSMUSG00000034574	24.2652	-1.48864	0.0263316	Daam1
ENSMUSG00000076609	15285.2	-1.42302	6.59197e-15	Igkc
ENSMUSG00000040466	70.05	-1.32332	0.00159448	Blvrb
ENSMUSG00000077394	44.514	-1.30444	0.0344765	Gm24339
ENSMUSG00000030325	117.05	-1.28255	8.76313e-08	Klrb1c
ENSMUSG00000026581	47.5612	-1.11582	0.00289167	Sell
ENSMUSG00000029657	483.15	-1.08595	0.000575035	Hsph1
ENSMUSG00000118773	92.3503	-1.0373	0.00107106	NA
ENSMUSG00000043336	100.987	-1.03475	4.81709e-06	Filip1l
ENSMUSG00000047586	103.913	-0.97944	0.0428638	Nccrp1
ENSMUSG00000044468	59.5247	-0.940411	0.00331596	Fam46c
ENSMUSG00000044177	215.393	-0.919717	0.013553	Wfikkn2
ENSMUSG00000100801	186.385	-0.900618	0.00318236	Gm15459
ENSMUSG00000038418	83.5349	-0.821239	0.00598903	Egr1
ENSMUSG00000021250	95.2264	-0.810246	0.0293062	Fos
ENSMUSG00000031765	259.415	-0.801971	0.0441189	Mt1
ENSMUSG00000121035	85.7113	-0.780139	0.0197877	NA
ENSMUSG00000010048	132.446	-0.773079	0.0428638	Ifrd2
ENSMUSG00000026019	80.5221	-0.769647	0.00517742	Wdr12
ENSMUSG00000026070	503.546	-0.76	8.7877e-07	Il18r1
ENSMUSG00000001020	960.436	-0.758478	0.000313099	S100a4
ENSMUSG00000067149	156.231	-0.717977	0.00843633	Igj
ENSMUSG00000052684	172.303	-0.707582	0.017904	Jun
ENSMUSG00000023927	363.176	-0.702898	0.00202025	Satb1
ENSMUSG00000083337	335.352	-0.69831	0.0197877	Gm11539
ENSMUSG00000030786	169.229	-0.694529	0.0331583	Itgam
ENSMUSG00000046721	348.798	-0.655403	0.0331133	Rpl14-ps1
ENSMUSG00000024966	795.709	-0.598346	0.00397497	Stip1
ENSMUSG00000025823	523.574	-0.589	0.00458085	Pdia4
ENSMUSG00000121141	1141.1	-0.584182	0.0176405	NA
ENSMUSG00000032221	474.261	-0.56071	0.000515821	Mns1
ENSMUSG00000020484	382.781	-0.545091	0.0101778	Xbp1
ENSMUSG00000027881	2638.34	-0.543119	2.4818e-05	Prpf38b
ENSMUSG00000015656	11609.1	-0.542214	0.0204632	Hspa8
ENSMUSG00000022403	1455.23	-0.531535	0.000608477	St13
ENSMUSG00000028937	543.992	-0.525172	0.0221131	Acot7
ENSMUSG00000022774	190.409	-0.518552	0.0135227	Ncbp2
ENSMUSG00000024991	3931.32	-0.511118	0.00137487	Eif3a
ENSMUSG00000028410	613.559	-0.510133	0.0107943	Dnaja1
ENSMUSG00000028069	228.639	-0.504703	0.00645984	Gpatch4
ENSMUSG00000000078	501.923	-0.504094	0.00953876	Klf6
ENSMUSG00000120012	193.876	-0.503358	0.0100995	NA

## Sheet: D10 KO UP
Geneid	baseMean	log2FoldChange	padj	gene_name
ENSMUSG00000026573	23.7571	1.47867	0.0100995	Xcl1
ENSMUSG00000027947	50.3113	1.36682	0.000143299	Il6ra
ENSMUSG00000026989	49.7405	1.32519	0.0123912	Dapl1
ENSMUSG00000054469	21.2356	1.31844	0.0331133	Lclat1
ENSMUSG00000003555	48.6003	1.22398	0.00384276	Cyp17a1
ENSMUSG00000020846	57.1212	1.19741	0.00842677	Fam101b
ENSMUSG00000116704	40.029	1.11824	0.0148248	NA
ENSMUSG00000035671	29.3077	1.11213	0.0173584	Zswim4
ENSMUSG00000100182	40.2469	0.959819	0.0178282	1810006J02Rik
ENSMUSG00000044320	70.6901	0.89499	0.00119436	1700001O22Rik
ENSMUSG00000100426	98.8737	0.887263	0.00159448	Gm4208
ENSMUSG00000079017	2178.7	0.837246	0.00953876	Ifi27l2a
ENSMUSG00000046879	88.2671	0.824071	0.0175861	Irgm1
ENSMUSG00000033350	83.0088	0.808689	0.00289167	Chst2
ENSMUSG00000046808	121.984	0.797585	0.0180561	Atp10d
ENSMUSG00000038393	707.912	0.76831	0.00969571	Txnip
ENSMUSG00000017929	248.419	0.761888	0.0426985	B4galt5
ENSMUSG00000120140	201.598	0.759834	0.0428638	NA
ENSMUSG00000022708	205.634	0.739646	2.43638e-06	Zbtb20
ENSMUSG00000020474	103.444	0.73156	0.0191581	Polm
ENSMUSG00000091831	86.2723	0.719342	0.0126273	Gm4707
ENSMUSG00000045777	1187.37	0.696743	0.000246155	Ifitm10
ENSMUSG00000041420	83.7919	0.683226	0.0197877	Meis3
ENSMUSG00000045193	377.057	0.671408	0.022187	Cirbp
ENSMUSG00000028228	111.23	0.665209	0.0228392	Cpne3
ENSMUSG00000015846	375.616	0.652002	0.0088841	Rxra
ENSMUSG00000015355	653.962	0.641185	0.0305691	Cd48
ENSMUSG00000075289	96.0241	0.619568	0.0479683	Carns1
ENSMUSG00000016206	221.217	0.619353	0.0324007	H2-M3
ENSMUSG00000040270	136.585	0.605062	0.00384276	Bach2
ENSMUSG00000083716	123.336	0.604121	0.040293	Gm13436
ENSMUSG00000017756	136.487	0.594868	0.00965381	Slc12a7
ENSMUSG00000032089	618.506	0.586287	0.0114222	Il10ra
ENSMUSG00000019818	429.937	0.575313	0.00829298	Cd164
ENSMUSG00000026307	249.372	0.556725	0.00396004	Scly
ENSMUSG00000031885	316.459	0.553708	0.00289167	Cbfb
ENSMUSG00000028064	455.693	0.526041	0.0361461	Sema4a
ENSMUSG00000044250	365.272	0.508546	0.00965381	Pced1b
ENSMUSG00000062825	2600.27	0.507542	0.00501052	Actg1
ENSMUSG00000024193	474.801	0.504698	0.00371656	Phf1
