# Supplementary material for: Conditional T and NK cell antagonism by a giant and highly conserved orthopoxvirus virulence factor
Source: Research Square preprint supplement (doi:10.21203/rs.3.rs-8672980/v1), 2026-02-04
Supplement: Supplementary file 4 [file d3a83d738f4d03f75c8dab71.xlsx]

## Sheet: Sheet1
Table S4
Target	Forward Primer	Reverse Primer
Gapdh	tgtccgtcgtggatctgac	cctgcttcaccaccttcttg
Evm003	tctgtcctttaacagcatagatgtaga	tgttaactcggaagttgatatggta
